# Supplementary material for: Protocol for development of a core outcome set for clinical trials in melasma
Source: PubMed Central journal article supplement — BMJ Open. 2022 Feb 4;12(2):e046953. doi: 10.1136/bmjopen-2020-046953 (PMC8819827; doi:10.1136/bmjopen-2020-046953), 2022-02-04
Supplement: bmjopen-2020-046953.draft_revisions.pdf [file bmjopen-2020-046953.draft_revisions.pdf]

# BMJ Open

BMJ Open is committed to open peer review. As part of this commitment we make the peer review history of every article we publish publicly available.

When an article is published we post the peer reviewers' comments and the authors' responses online. We also post the versions of the paper that were used during peer review. These are the versions that the peer review comments apply to.

The versions of the paper that follow are the versions that were submitted during the peer review process. They are not the versions of record or the final published versions. They should not be cited or distributed as the published version of this manuscript.

BMJ Open is an open access journal and the full, final, typeset and author-corrected version of record of the manuscript is available on our site with no access controls, subscription charges or pay-per-view fees (<http://bmjopen.bmj.com>).

If you have any questions on BMJ Open's open peer review process please email [info.bmjopen@bmj.com](mailto:info.bmjopen@bmj.com)

# BMJ Open

## Protocol for Development of a Core Outcome Set for Clinical Trials in Melasma

|                               |                                                                                                                                                                                                                                                                                                                                                                                                                                                                                                                                                                                                                                                                                                                                                                                                                                                                                                                                  |
|-------------------------------|----------------------------------------------------------------------------------------------------------------------------------------------------------------------------------------------------------------------------------------------------------------------------------------------------------------------------------------------------------------------------------------------------------------------------------------------------------------------------------------------------------------------------------------------------------------------------------------------------------------------------------------------------------------------------------------------------------------------------------------------------------------------------------------------------------------------------------------------------------------------------------------------------------------------------------|
| Journal:                      | <i>BMJ Open</i>                                                                                                                                                                                                                                                                                                                                                                                                                                                                                                                                                                                                                                                                                                                                                                                                                                                                                                                  |
| Manuscript ID                 | bmjopen-2020-046953                                                                                                                                                                                                                                                                                                                                                                                                                                                                                                                                                                                                                                                                                                                                                                                                                                                                                                              |
| Article Type:                 | Protocol                                                                                                                                                                                                                                                                                                                                                                                                                                                                                                                                                                                                                                                                                                                                                                                                                                                                                                                         |
| Date Submitted by the Author: | 13-Nov-2020                                                                                                                                                                                                                                                                                                                                                                                                                                                                                                                                                                                                                                                                                                                                                                                                                                                                                                                      |
| Complete List of Authors:     | Ibrahim, Sarah; Northwestern University Feinberg School of Medicine, Dermatology<br>Kang, Bianca; Northwestern University Feinberg School of Medicine, Dermatology<br>Schlessinger, Daniel; Washington University in St Louis, Dermatology<br>Chiren, Sarah; Northwestern University Feinberg School of Medicine, Dermatology<br>Tang, Jennifer; University of Miami Miller School of Medicine<br>Kirkham, Jamie J.; Manchester University, Biostatistics<br>Schmitt, Jochen; Medical Faculty Carl Gustav Carus, Technical University<br>Dr.esden, Center for Evidence-based Healthcare<br>Poon, Emily; Northwestern University Feinberg School of Medicine, Dermatology<br>Maher, Ian; University of Minnesota<br>Sobanko, Joseph; University of Pennsylvania Health System<br>Cartee, Todd; Penn State Health Milton S Hershey Medical Center<br>Alam, Murad; Northwestern University Feinberg School of Medicine, Dermatology |
| Keywords:                     | Protocols & guidelines < HEALTH SERVICES ADMINISTRATION & MANAGEMENT, Clinical trials < THERAPEUTICS, DERMATOLOGY                                                                                                                                                                                                                                                                                                                                                                                                                                                                                                                                                                                                                                                                                                                                                                                                                |
|                               |                                                                                                                                                                                                                                                                                                                                                                                                                                                                                                                                                                                                                                                                                                                                                                                                                                                                                                                                  |

SCHOLARONE™  
Manuscripts

## 1 **Protocol for Development of a Core Outcome Set for Clinical Trials in** 2 **Melasma**

3 Sarah A. Ibrahim, BA<sup>1</sup>; Bianca Y. Kang, BS<sup>1</sup>; Daniel I. Schlessinger, MD<sup>2</sup>; Sarah G. Chiren,  
4 BA<sup>1</sup>; Jennifer C. Tang, MD<sup>3</sup>; Jamie J. Kirkham, PhD<sup>4</sup>; Jochen Schmitt, MD<sup>5</sup>; Emily Poon,  
5 PhD<sup>1</sup>; Ian A. Maher, MD<sup>6</sup>; Joseph F. Sobanko, MD<sup>7,8</sup>; Todd V. Cartee, MD<sup>9</sup>; Murad Alam, MD,  
6 MSCI, MBA<sup>1,10,11</sup>

7 <sup>1</sup>Department of Dermatology, Feinberg School of Medicine, Northwestern University, Chicago,  
8 IL, USA.

9 <sup>2</sup>Division of Dermatology, Department of Internal Medicine, Washington University in St.  
10 Louis, St. Louis, MO, USA.

11 <sup>3</sup>Department of Dermatology and Cutaneous Surgery, University of Miami Miller School of  
12 Medicine, Miami, FL, USA.

13 <sup>4</sup>Centre for Biostatistics, Manchester Academic Health Science Centre, University of  
14 Manchester, Manchester, United Kingdom.

15 <sup>5</sup>Centre for Evidence-Based Healthcare, Medizinische Fakultät Carl Gustav Carus, TU Dresden,  
16 Dresden, Germany.

17 <sup>6</sup>Department of Dermatology, University of Minnesota, Minneapolis, MN, USA.

18 <sup>7</sup>Department of Dermatology, University of Pennsylvania, Philadelphia, PA, USA.

19 <sup>8</sup>Division of Dermatologic Surgery, University of Pennsylvania, Philadelphia, PA, USA.

20 <sup>9</sup>Department of Dermatology, Penn State Health, Hershey, PA, USA.

21 <sup>10</sup>Department of Otolaryngology, Feinberg School of Medicine, Northwestern University,  
22 Chicago, IL, USA.

23 <sup>11</sup>Department of Surgery, Feinberg School of Medicine, Northwestern University, Chicago, IL,  
24 USA.

### 25 **Corresponding Author:**

26 Murad Alam, MD  
27 Northwestern University Department of Dermatology  
28 676 N. St. Clair, Suite 1600  
29 Chicago, Illinois 60611  
30 Phone: (312) 695-6647; Fax: (312) 695-0044  
31 [m-alam@northwestern.edu](mailto:m-alam@northwestern.edu)

1  
2  
3  
4445 **Word Count** Abstract: 298 Manuscript: 2690/4000

46

47 **Keywords:** core outcome set, protocol, development, clinical trials, melasma8  
9  
4810  
11  
12  
13  
14  
15  
16  
17  
18  
19  
20  
21  
22  
23  
24  
25  
26  
27  
28  
29  
30  
31  
32  
33  
34  
35  
36  
37  
38  
39  
40  
41  
42  
43  
44  
45  
46  
47  
48  
49  
50  
51  
52  
53  
54  
55  
56  
57  
58  
59  
60

For peer review only

1  
2  
3 50 **ABSTRACT**  
4

5 51 **Introduction:** Melasma is a pigmentation disorder of the skin. Characterized by brown to gray-  
6 brown patches on the face and neck, the condition predominantly affects women and has been  
7  
8 52 brown patches on the face and neck, the condition predominantly affects women and has been  
9  
10 53 associated with pregnancy, hormonal variation, and sun exposure. Melasma can be disfiguring  
11  
12 54 and anxiety-provoking, and quality of life is often adversely impacted. Management includes sun  
13  
14 55 protection, laser and energy device therapy, topical and oral skin-bleaching agents, and chemical  
15  
16 56 peels. While clinical trials of melasma exist, there is a lack of consistency in reported outcomes,  
17  
18 57 which has been a barrier to the aggregation of data in systematic reviews and meta-analyses. This  
19  
20 58 protocol describes a planned process for development of a minimum set of outcomes (i.e., “core  
21  
22 59 outcome set”) that should be measured in all clinical trials of melasma.  
23  
24  
25

26 60 **Methods and Analysis:** An exhaustive list of potential outcomes will be extracted from four  
27  
28 61 sources: 1) systematic literature review of outcomes in clinical trials; 2) semi-structured patient  
29  
30 62 interviews; 3) brochures, pamphlets, clinical trial registries, and other published and unpublished  
31  
32 63 sources and documentation; and 4) interviews with non-patient, non-physician stakeholders,  
33  
34 64 including federal regulators, industry scientists, and non-physician providers. An international  
35  
36 65 two-round Delphi process will then be performed to identify the outcomes deemed most  
37  
38 66 important to patients and physicians. Subsequently, a consensus meeting will be convened to  
39  
40 67 review and process the results, and to vote on a final set of core outcomes.  
41  
42  
43

44 68 **Ethics and Dissemination:** Ethics approval was provided by the Northwestern University  
45  
46 69 Institutional Review Board (IRB) (protocol ID: STU00201637). This study is registered with  
47  
48 70 both the COMET and CS-COUSIN initiatives, and this protocol is in accordance with the  
49  
50 71 guidelines for protocol development of both groups. All findings from the study described in this  
51  
52  
53  
54  
55  
56  
57  
58  
59  
60

1  
2  
3 72 protocol will be disseminated to all stakeholders involved in the development process and will be  
4  
5 73 submitted for publication in peer-reviewed journals.  
6  
7  
8  
9  
10  
11  
12  
13  
14  
15  
16  
17  
18  
19  
20  
21  
22  
23  
24  
25  
26  
27  
28  
29  
30  
31  
32  
33  
34  
35  
36  
37  
38  
39  
40  
41  
42  
43  
44  
45  
46  
47  
48  
49  
50  
51  
52  
53  
54  
55  
56  
57  
58  
59  
60

## 74 ARTICLE SUMMARY

### 75 Strengths and Limitations of This Study

- 76 • This protocol describes a planned process for the development of a minimum set of  
77 outcomes (i.e., “core outcome set”) that should be measured in all clinical trials of  
78 melasma.
- 79 • A long list of potential outcomes will be extracted from a systematic literature review,  
80 semi-structured interviews, brochures and pamphlets, clinical trial registries, and other  
81 published and unpublished sources and documentation.
- 82 • An international group of stakeholders, including patients, physicians, federal regulators,  
83 industry scientists, pharmacologists and pharmacists, nurses, and non-physician providers  
84 will be included in the process.
- 85 • At least two rounds of Delphi process will then be performed to identify a provisional list  
86 of outcomes meeting a 70% consensus level for patient and physicians.
- 87 • A consensus meeting will be convened to review and process the results, and to vote on a  
88 final set of core outcomes.

## 97 INTRODUCTION

98 Melasma is a chronic hyperpigmentation disorder primarily occurring in women.[1,2]  
99 The condition is characterized by brown, irregularly shaped macules and patches, commonly of  
100 the bilateral upper cheeks, mid forehead, and upper lip. Predisposing risk factors for the  
101 development of melasma include darker skin types III and IV, genetic predisposition, ultraviolet  
102 radiation, and hormonal changes due to pregnancy, menopause, or medications.[3–5] However,  
103 melasma remains a poorly understood condition that also arises in the absence of traditional risk  
104 factors, with a significant minority of cases occurring in men.[6] Histologically, there is an  
105 increase of melanocytes and solar elastosis in the epidermis of melasma lesions compared to  
106 normal skin.[2,4,7] Due to its sometimes striking impact on cosmetic appearance, melasma can  
107 cause psychological distress, thereby negatively affecting quality of life.[3]

108 Melasma is typically divided into three subtypes (epidermal, dermal, or mixed) and can  
109 be classified via Wood's Lamp examination. Severity of lesions and area of involvement can be  
110 assessed using validated or more *ad hoc* measurement tools. Melasma has been treated with  
111 various modalities, including lasers and lights, chemical peels, skin-bleaching agents, such as  
112 hydroquinone, or oral agents, like tranexamic acid.[1,8] However, current treatments are of  
113 limited efficacy and recurrence is the norm. Additionally, extant studies seldom assess patient-  
114 reported outcomes, which are particularly relevant given the disfiguring nature of melasma.

115 Systematic reviews of treatments for melasma are limited in utility by the lack of  
116 standardization in outcomes across trials.[8] The selective inclusion of outcomes in publications,  
117 so-called selective outcome reporting bias, remains a problem in the reporting of clinical trials.  
118 In particular, the heterogeneity of outcomes reported across trials may affect the  
119 recommendations and conclusions of systematic reviews.[9] In order to address the



1  
2  
3 120 heterogeneity of outcomes in clinical trials of the same disease or condition, The Core Outcome  
4  
5 121 Measures in Effectiveness Trials (COMET) initiative was created, with the goal of providing  
6  
7  
8 122 methodological support to facilitate development of standardized core outcome sets to be  
9  
10 123 measured in health-related research.[10] A core outcome set (COS) is defined as a consensus-  
11  
12 124 derived set of outcomes that are measured at minimum in all clinical studies of a given condition  
13  
14  
15 125 or disease. Similarly, another group, the Cochrane Skin - Core Outcome Set Initiative (CS-  
16  
17 126 COUSIN), was developed specifically to address core outcome sets in dermatology.[11] CS-  
18  
19 127 COUSIN provides methodological support, and much of its approach is based on the experience  
20  
21 128 of the Harmonizing Outcome Measures for Eczema (HOME) initiative.[12–16]

22  
23  
24 129 To date, there has been no core outcome set published specifically for melasma. The data  
25  
26 130 obtained from the investigation described in this protocol is expected to standardize the design of  
27  
28 131 future clinical trials of melasma.  
29  
30

### 31 132 32 33 34 133 **Objective**

35  
36  
37 134 The aim of this study will be to develop an international core outcome set relevant to  
38  
39 135 clinical trials of melasma. The objectives are to determine what outcomes should be measured at  
40  
41 136 a minimum in all clinical trials of melasma.  
42  
43  
44

### 45 137 46 47 48 138 **Scope of this COS**

49  
50  
51 139 This COS is envisioned as the global standard for all clinical trials examining the efficacy  
52  
53 140 and safety of all melasma interventions. The core outcome set to be developed is intended to  
54  
55 141 apply to all individuals with melasma, regardless of age, gender, and ethnicity.  
56  
57  
58  
59  
60

## 142 **METHODS AND ANALYSIS**

143 This study was designed using guidance provided by the CS-COUSIN and COMET  
144 initiatives and has been registered with both organizations.[17–20] Additional guidance was  
145 provided by the Harmonising Outcome Measures for Eczema (HOME) roadmap.[16] The  
146 reporting of this protocol conforms to the COS-STAP (The Core Outcome Set-STANDARDISED  
147 Protocol Items) Statement checklist and the CS-COUSIN Core Domain Development Process  
148 guidance [supplementary file 1].[18,21] This protocol is also based on prior work in protocol  
149 development by the Measurement of Priority Outcome Variables in Dermatologic Surgery  
150 (IMPROVED) Group, a core outcome set development organization for dermatologic surgery-  
151 related conditions.[22]

### 153 **Study Oversight**

154 The international study steering committee developing this COS will include four  
155 physicians (MA, IAM, JFS, TVC) as well as a patient representative. The latter, who will also  
156 have melasma, will represent others with this condition by providing input at key points to  
157 ensure that the patient perspective is incorporated. The four physicians have prior experience in  
158 developing core outcome sets in dermatology and therefore also act as researchers in COS  
159 development. The steering committee will lead each stage of COS development and ensure  
160 methodological quality throughout the study. In addition, an independent member of the CS-  
161 COUSIN Methods Group (JJK) will provide guidance on the most current methodological  
162 recommendations for COS development.

163

## 164 Study Design

### 165 Identification of Outcomes

166 A long list of outcomes will be generated from four sources. First, a systematic review of  
167 the literature will be performed to identify and extract outcomes measured in randomized  
168 controlled trials of melasma. Specifically, PubMed/Medline, and Embase will be searched for  
169 the period 2006-16 to detect English language human RCTs using the following terms:  
170 [(melasma [title/abstract]) AND (randomized controlled trial[publication type]) AND  
171 (treatment)]. Second, other printed and electronic sources, including clinical trial registries,<sup>1</sup>  
172 patient pamphlets,<sup>2</sup> medical society brochures, and relevant FDA/EMA guidance documents, will  
173 be reviewed to identify any additional outcomes not detected in the systematic review. Third,  
174 outcomes valued by patients will be identified by conducting semi-structured interviews with  
175 patients diagnosed with melasma.<sup>3</sup> These interviews will be audio-recorded, transcribed, and  
176 analyzed by the methods of qualitative research to find outcomes considered relevant by patients.  
177 Fourth, semi-structured interviews will be performed to identify any remaining outcomes  
178 deemed relevant by representatives of key non-physician, non-patient stakeholder classes,  
179 including industry scientists,<sup>4</sup> pharmacologists and pharmacists, drug and device safety

---

1 Clinicaltrials.gov searched for “melasma”, 2017-2021, no exclusion criteria.

2 American Academy of Dermatology website searched for “melasma”, with inclusion criteria being “all patient education material”, and no exclusion criteria.

3 The Electronic Data Warehouse (EDW) of outpatient dermatology clinics at Northwestern University will be searched to identify patients who have received consultations or treatments for melasma. At least 20 patients will be contacted by telephone for interviews. Those who agree to respond will each be scheduled via email for a 30-minute interview.

4 Leaders at a purposive sample of large, medium-sized, and small US drug, device, and cosmetic companies involved in research on products for melasma will be contacted to ask for identification of qualified industry scientists in their employ who can help identify additional outcomes. In total, up to 20 industry scientists will be contacted.

1  
2  
3 180 regulators<sup>5</sup>, nurses, and physician assistants. Non-physician, non-patient stakeholders will not be  
4  
5 181 invited to participate in the subsequent Delphi process but will be invited to the final consensus  
6  
7  
8 182 meeting.

183

#### 184 Final Review of Long List of Outcomes

185 The outcomes obtained from the sources above will be collated into a long list of  
186 provisional outcomes. Members of the steering committee will review and condense this list,  
187 eliminating duplicate items and combining items when possible without loss of content. The  
188 list of outcomes will then be placed into appropriate domains by two steering committee  
189 members using the COMET and CS-COUSIN taxonomies.[23,24]. Lay definitions will be  
190 appended to all outcomes and reviewed by the melasma steering group patient representative to  
191 assure that patient stakeholders can actively participate in the forthcoming Delphi consensus  
192 process.

193

#### 194 Delphi Participants

195 Two separate groups, consisting of physicians and patients, respectively, will be invited  
196 to take part in the Delphi process. A global context will be provided by inviting physicians from  
197 the United States and from other countries on various continents, including a range of ethnicities.

---

50 Drug and device safety regulators from the countries most represented in the systematic review will be contacted for  
51 interviews. When their names are publicly available, officials from dermatology or cosmetic-related offices within  
52 these regulatory agencies will be contacted first.

53  
54 <sup>5</sup> US Food and Drug Administration, European Medicines Agency, Ministry of Food and Drug Safety (Korean),  
55 Pharmaceuticals and Medical Devices Agency (Japan), Health Canada, Brazilian Health Regulatory Agency  
56 (ANVISA).  
57  
58  
59

1  
2  
3 198 To include the perspective of researchers, the senior authors of all clinical trials extracted in our  
4  
5 199 literature review will be included in the physician group. Eligible physician stakeholders will  
6  
7 200 include dermatologists, clinical researchers, primary care providers, and other medical specialists  
8  
9 201 who have experience treating melasma. Demographic information, including participants'  
10  
11 202 ethnicity, gender, and specialty will be recorded. To account for potential dropouts, at least 100  
12  
13 203 physicians meeting any of the following criteria will be invited: corresponding author of a  
14  
15 204 clinical trial of melasma included in our systematic review; among the most frequently  
16  
17 205 published authors on melasma treatment, as identified through electronic databases; recent  
18  
19 206 lecturer on the topic of melasma at national or international dermatology professional society  
20  
21 207 meetings in any country; or a member of a national or international dermatologic society<sup>6</sup> with  
22  
23 208 clinical expertise in melasma treatment, as demonstrated by committee or other affiliations.  
24  
25 209 Physicians who agree to participate will be asked to identify one or more melasma patients who  
26  
27 210 may be invited to join the patient Delphi group.  
28  
29  
30  
31  
32  
33  
34  
35  
36  
37  
38  
39

211

## 212 Delphi Process

213 From the long list of potential outcomes vetted by the steering committee, a core set of  
214 outcomes will be provisionally selected by stakeholders through a Delphi process, as

---

<sup>6</sup> Representative board members of the following societies will be invited to participate as individuals in the Delphi to ensure inclusion of the perspectives of expert clinicians and researchers who may not have recently published in the literature: American Academy of Dermatology Association; American Society for Laser Medicine and Surgery; African Society of Dermatology and Venereology; Asian Academy of Dermatology and Venereology; Arab Academy of Dermatology and Aesthetics; Argentine Society of Dermatology; Brazilian Society of Dermatology; British Association of Dermatologists; Canadian Dermatology Association; European Academy of Dermatology and Venereology; French Society of Dermatology; Mexican Society of Dermatology; Skin of Color Society; World Congress of Dermatology.

1  
2  
3 215 recommended by the COMET and CS-COUSIN initiatives [17,18, 24]. Specifically, each  
4  
5 216 Delphi participant will be asked to rate each outcome for its level of importance on a scale from  
6  
7 217 1-9. Average ratings for each outcome, and relevant participant comments, will then be  
8  
9 218 redistributed to each survey participant, who will have the option of changing his or her earlier  
10  
11 219 ratings based on the additional information surfaced in this process. Prior to a consensus  
12  
13 220 meeting, at least two Delphi rounds will be conducted using DelphiManager software available  
14  
15 221 for this purpose from COMET.  
16  
17  
18  
19  
20 222  
21  
22

## 23 223 Delphi Rounds

24  
25  
26 224 During each Delphi round, the provisional outcomes in the long list will be presented to  
27  
28 225 each participant for rating. Participants will rate each outcome on a 9-point scale developed by  
29  
30 226 the Grading of Recommendations Assessment, Development and Evaluation (GRADE) working  
31  
32 227 group, with “9” denoting “critically important” and “1,” “not that important.” [25] In each  
33  
34 228 round, each participant will have the option to select “10” if they are uncertain about an  
35  
36 229 outcome’s need for inclusion. Also in each round, each participant will have the option to  
37  
38 230 identify new outcomes that they feel should be added in the subsequent round. All previously  
39  
40 231 included outcomes will be carried to the next round. Participants will have 3 weeks to complete  
41  
42 232 each Delphi round, and will receive weekly reminders until they do or time expires.  
43  
44  
45  
46

47 233 Results from Round 1 will be analyzed by outcome and for each stakeholder group.  
48  
49 234 After Round 1, a virtual meeting will be held with participants to discuss the results of the first  
50  
51 235 round, and to allow participants to share their thoughts about items they found particularly  
52  
53 236 salient or controversial. Then, Round 2 will commence. In Round 2, participants will be  
54  
55  
56  
57  
58  
59  
60

1  
2  
3 237 graphically shown the distribution of scores for each item for each stakeholder group from  
4  
5 238 Round 1, and also their own individual ratings for each outcome from the previous round, and  
6  
7  
8 239 asked to score each item again. New outcomes will be added to Round 2 if suggested by two or  
9  
10 240 more participants in Round 1, with any uncertainties addressed by the steering committee.  
11  
12 241 Summarized scores from Round 2, analyzed by outcome and for each stakeholder group, will be  
13  
14  
15 242 presented at the consensus meeting.  
16

#### 17 243 18 19 244 Definition of Provisional Consensus

20  
21  
22 245 Outcomes will be *retained* in the provisional consensus pool if 70% of the participants  
23  
24 246 score 7, 8, or 9 with less than 15% scoring 1-3.[26] Outcomes will be *removed* from the  
25  
26  
27 247 provisional consensus pool if 70% or more of the participants score 1, 2, or 3 and less than 15%  
28  
29 248 score 7- 9. Outcomes that have not reached consensus will also be retained for discussion during  
30  
31 249 the consensus meeting.  
32

#### 33 34 250 35 36 37 251 Consensus Meeting

38  
39  
40 252 A consensus meeting will be held to discuss the results of Delphi, to review the  
41  
42 253 provisional core outcome set as well as the outcomes for which consensus has not be reached,  
43  
44  
45 254 and to move towards selection of a final core outcome set. This meeting will be moderated by an  
46  
47 255 independent facilitator, and invited participants will include all physicians and patients who  
48  
49 256 participated in both rounds of the Delphi. If time constraints and other limitations preclude a  
50  
51 257 single consensus meeting, multiple virtual consensus meetings will be held, with each having  
52  
53  
54  
55  
56  
57  
58  
59  
60

258 balanced representation across stakeholder groups and geographic regions to ensure the result is  
259 development of a global COS.

260 Informed by the Delphi results, feedback regarding the consensus-derived set of  
261 provisional outcomes and outcomes for which consensus has not been reached will be elicited  
262 from the consensus meeting participants with the assistance of the facilitator. Using live polling  
263 software, participants will vote to include or not include outcomes into the final core set of  
264 outcomes. If multiple consensus meetings are held, and if there is any inconsistency between the  
265 outcomes selected in these, a final email ballot will be circulated to all consensus meeting  
266 participants to confirm the final COS. The result will be a core outcome set that reflects the  
267 priorities and concerns of all stakeholders.

268

### 269 **Timeline**

270 The expected timeline from the start of the study to full development of the core set of  
271 outcome domains will be one year. Identification of an initial list of outcomes, including  
272 systematic review and qualitative interviews, will span approximately five months. An additional  
273 seven months will be dedicated to conducting the Delphi survey and convening the consensus  
274 meeting.

275

### 276 **Patient and Public Involvement**

277 The patient and public perspective will be sought at multiple points in this study. Patient  
278 stakeholders will review plain language summaries of outcome definitions. A minimum of one



1  
2  
3 279 patient representative will be included in the research team, as described earlier in this protocol.  
4

5 280 Additionally, patients will be recognized as key stakeholders during the identification and  
6

7 281 prioritization of outcomes, with fully one-half of the Delphi process reserved for patients.  
8

9  
10 282 Patients will be encouraged to provide feedback before (semi-structured interviews), during, and  
11

12 283 after (at the consensus meeting) the Delphi process to ensure that patient-centered outcomes are  
13

14 284 incorporated. Lastly, with their consent, patient representatives will be named as contributors in  
15

16 285 any published work that arises from the study.  
17  
18  
19  
20 286  
21  
22

## 23 287 **ETHICS AND DISSEMINATION**

### 24 25 288 **Dissemination and Implementation of Results**

26  
27  
28 289 The full development of this COS and the results of the study will be reported in peer-  
29

30 290 reviewed journals. The main results of the study, including the core outcome set, will be  
31

32 291 disseminated to all participants through email at the time of study publication. Researchers will  
33

34 292 be encouraged to use the COS when performing future trials.  
35  
36  
37  
38 293  
39  
40

### 41 294 **Ethical Approval and Consent to Participate**

42  
43  
44 295 Ethical approval and consent to participate for the study has been granted from the  
45

46 296 Northwestern University Institutional Review Board (IRB) (protocol ID: STU00201637).  
47

48 297 Informed consent will be obtained from all participants prior to their involvement in the study.  
49  
50  
51 298  
52  
53

## 54 299 **DISCUSSION**

55  
56  
57  
58  
59  
60

1  
2  
3 300 Despite the numerous completed and ongoing clinical trials of treatments for melasma,  
4  
5 301 there is currently no COS informing such investigations. The proposed core outcome set for  
6  
7 302 melasma would provide a minimum set of outcomes to be reported in all trials of melasma, thus  
8  
9  
10 303 standardizing future outcomes reporting. Investigators would be free to consider and include  
11  
12 304 additional outcomes beyond the core set, but their use of at least the core set would allow  
13  
14 305 aggregation and comparison of data across melasma trials. Cross-trial comparisons of  
15  
16  
17 306 treatments and large-scale meta-analyses would, in turn, enable more definitive conclusions on  
18  
19 307 the merits of available treatments.  
20  
21

22 308

### 25 309 **Trial Registration and Status**

28 310 This study has been registered with both the COMET and CS-COUSIN initiatives for  
29  
30 311 core outcome set development, and the development of this protocol is in accordance with the  
31  
32 312 guidelines for protocol development of both groups. The development of the core outcome set is  
33  
34  
35 313 currently in its initial phase of outcome extraction.  
36  
37

38 314

41 315

1  
2  
3 317 **DECLARATIONS:**  
4

5 318  
6

7  
8 319 **Abbreviations**  
9

10 320 **COMET:** Core Outcome Measures in Effectiveness Trials  
11

12 321 **COS:** Core outcome set  
13

14 322 **CS-COUSIN:** Cochrane Skin - Core Outcome Set Initiative  
15

16 323 **HOME:** Harmonising Outcome Measures for Eczema  
17

18 324 **IMPROVED:** Measurement of Priority Outcome Variables in Dermatologic Surgery Group  
19  
20

21 325  
22

23  
24 326 **Consent for publication**  
25

26 327 All authors consent.  
27

28 328  
29

30  
31 329 I, the Submitting Author has the right to grant and does grant on behalf of all authors of the Work (as  
32  
33 330 defined in the below author licence), an exclusive licence and/or a non-exclusive licence for contributions  
34  
35 331 from authors who are: i) UK Crown employees; ii) where BMJ has agreed a CC-BY licence shall apply,  
36  
37 332 and/or iii) in accordance with the terms applicable for US Federal Government officers or employees  
38  
39 333 acting as part of their official duties; on a worldwide, perpetual, irrevocable, royalty-free basis to BMJ  
40  
41 334 Publishing Group Ltd (“BMJ”) its licensees and where the relevant Journal is co-owned by BMJ to the  
42  
43 335 co-owners of the Journal, to publish the Work in BMJ Open and any other BMJ products and to exploit  
44  
45 336 all rights, as set out in our licence.  
46

47 337  
48

49 338 The Submitting Author accepts and understands that any supply made under these terms is made by BMJ  
50  
51 339 to the Submitting Author unless you are acting as an employee on behalf of your employer or a  
52  
53 340 postgraduate student of an affiliated institution which is paying any applicable article publishing charge  
54  
55 341 (“APC”) for Open Access articles. Where the Submitting Author wishes to make the Work available on  
56  
57  
58  
59  
60

1  
2  
3 342 an Open Access basis (and intends to pay the relevant APC), the terms of reuse of such Open Access shall  
4  
5 343 be governed by a Creative Commons licence – details of these licences and which Creative  
6  
7 344 Commons licence will apply to this Work are set out in our licence referred to above.  
8  
9  
10 345

### 11 346 **Data availability statement**

12  
13  
14 347 There are no data in this work.  
15  
16 348

### 17 18 349 **Funding**

19  
20  
21 350 This publication was supported by Merz Center for Quality and Outcomes Research in  
22  
23 351 Dermatologic Surgery and the IMPROVED (Measurement of Priority Outcome Variables in  
24  
25 352 Dermatologic Surgery) Group.  
26  
27  
28 353

### 29 30 354 **Competing Interests**

31  
32 355 None of the authors have personal or financial relationships with other people or organizations that may  
33  
34 356 influence their interpretation of data or presentation of information. Several of the authors (JFS, TVC,  
35  
36 357 IAN, JJK, KS, MA) have been involved also in the development of other core outcome sets, and several  
37  
38 358 (JJK, JS, MA) are members of the CS-COUSIN Methods group.  
39  
40  
41 359

### 42 43 360 **Acknowledgments**

44  
45 361 None  
46  
47  
48 362

### 49 50 363 **Author Contributions**

51  
52 364 *Study concept and design:* SAI, BYK, DIS, JT, JJK, JS, EP, IAM, JFS, TVC, and MA. *Drafting*  
53  
54 365 *of the manuscript:* SAI, BYK, SCG, EP, TVC, and MA. *Critical revision of the manuscript for*  
55  
56  
57  
58  
59  
60

1  
2  
3  
4  
5  
6  
7  
8  
9  
10  
11  
12  
13  
14  
15  
16  
17  
18  
19  
20  
21  
22  
23  
24  
25  
26  
27  
28  
29  
30  
31  
32  
33  
34  
35  
36  
37  
38  
39  
40  
41  
42  
43  
44  
45  
46  
47  
48  
49  
50  
51  
52  
53  
54  
55  
56  
57  
58  
59  
60

366 *important intellectual content:* SAI, BYK, DIS, JJK, EP, and MA. *Obtained funding:* MA. *Study*  
367 *supervision:* MA. All authors read and approved the final manuscript.

For peer review only

## 368 REFERENCES

- 369 1 Kauh YC, Zachian TF. Melasma. In: Mallia C, Uitto J, eds. *Rheumaderm: Current Issues in*  
370 *Rheumatology and Dermatology*. Boston, MA: : Springer US 1999. 491–9. doi:10.1007/978-  
371 1-4615-4857-7\_72
- 372 2 Kang WH, Yoon KH, Lee E-S, *et al*. Melasma: histopathological characteristics in 56  
373 Korean patients. *Br J Dermatol* 2002;**146**:228–37. doi:10.1046/j.0007-0963.2001.04556.x
- 374 3 Balkrishnan R, McMichael AJ, Camacho FT, *et al*. Development and validation of a health-  
375 related quality of life instrument for women with melasma. *Br J Dermatol* 2003;**149**:572–7.  
376 doi:10.1046/j.1365-2133.2003.05419.x
- 377 4 Mahmoud BH, Ruvolo E, Hexsel CL, *et al*. Impact of long-wavelength UVA and visible  
378 light on melanocompetent skin. *J Invest Dermatol* 2010;**130**:2092–7.  
379 doi:10.1038/jid.2010.95
- 380 5 Ortonne J, Arellano I, Berneburg M, *et al*. A global survey of the role of ultraviolet radiation  
381 and hormonal influences in the development of melasma. *J Eur Acad Dermatol Venereol*  
382 2009;**23**:1254–62. doi:10.1111/j.1468-3083.2009.03295.x
- 383 6 Jang YH, Sim JH, Kang HY, *et al*. The histopathological characteristics of male melasma:  
384 comparison with female melasma and lentigo. *J Am Acad Dermatol* 2012;**66**:642–9.  
385 doi:10.1016/j.jaad.2010.10.037
- 386 7 Hernández-Barrera R, Torres-Alvarez B, Castanedo-Cazares JP, *et al*. Solar elastosis and  
387 presence of mast cells as key features in the pathogenesis of melasma. *Clin Exp Dermatol*  
388 2008;**33**:305–8. doi:10.1111/j.1365-2230.2008.02724.x
- 389 8 Rajaratnam R, Halpern J, Salim A, *et al*. Interventions for melasma. *Cochrane Database Syst*  
390 *Rev* 2010;:CD003583. doi:10.1002/14651858.CD003583.pub2
- 391 9 Kirkham JJ, Dwan KM, Altman DG, *et al*. The impact of outcome reporting bias in  
392 randomised controlled trials on a cohort of systematic reviews. *BMJ* 2010;**340**.  
393 doi:10.1136/bmj.c365
- 394 10 COMET Initiative | Home. <http://www.comet-initiative.org/> (accessed 2 Oct 2020).
- 395 11 Core Outcomes Set Initiative (CS-COUSIN). [/core-outcomes-set-initiative-csg-cousin](http://www.core-outcomes-set-initiative-csg-cousin.org/)  
396 (accessed 2 Oct 2020).
- 397 12 Schmitt J, Williams H. Harmonising Outcome Measures for Eczema (HOME). Report from  
398 the First International Consensus Meeting (HOME 1), 24 July 2010, Munich, Germany. *Br J*  
399 *Dermatol* 2010;**163**:1166–8. doi:10.1111/j.1365-2133.2010.10054.x

- 1  
2  
3 400 13 Schmitt J, Spuls P, Boers M, *et al.* Towards global consensus on outcome measures for  
4 401 atopic eczema research: results of the HOME II meeting. *Allergy* 2012;**67**:1111–7.  
5 402 doi:10.1111/j.1398-9995.2012.02874.x  
6  
7  
8 403 14 Schmitt J, Spuls PI, Thomas KS, *et al.* The Harmonising Outcome Measures for Eczema  
9 404 (HOME) statement to assess clinical signs of atopic eczema in trials. *J Allergy Clin Immunol*  
10 405 2014;**134**:800–7. doi:10.1016/j.jaci.2014.07.043  
11  
12 406 15 Chalmers JR, Schmitt J, Apfelbacher C, *et al.* Report from the third international consensus  
13 407 meeting to harmonise core outcome measures for atopic eczema/dermatitis clinical trials  
14 408 (HOME). *Br J Dermatol* 2014;**171**:1318–25. doi:10.1111/bjd.13237  
15  
16 409 16 Schmitt J, Apfelbacher C, Spuls PI, *et al.* The Harmonizing Outcome Measures for Eczema  
17 410 (HOME) roadmap: a methodological framework to develop core sets of outcome  
18 411 measurements in dermatology. *J Invest Dermatol* 2015;**135**:24–30. doi:10.1038/jid.2014.320  
19  
20  
21 412 17 The COMET Handbook: version 1.0 | Trials | Full Text.  
22 413 <https://trialsjournal.biomedcentral.com/articles/10.1186/s13063-017-1978-4#Bib1> (accessed  
23 414 15 Sep 2020).  
24  
25 415 18 COUSIN\_guidance\_version\_5\_9\_2018.pdf. [http://cs-cousin.org/wordpress/wp-](http://cs-cousin.org/wordpress/wp-content/uploads/2018/11/COUSIN_guidance_version_5_9_2018.pdf)  
26 416 [content/uploads/2018/11/COUSIN\\_guidance\\_version\\_5\\_9\\_2018.pdf](http://cs-cousin.org/wordpress/wp-content/uploads/2018/11/COUSIN_guidance_version_5_9_2018.pdf) (accessed 15 Sep  
27 417 2020).  
28  
29  
30 418 19 COMET Initiative | Core Outcome Set for Melasma. [https://www.comet-](https://www.comet-initiative.org/studies/details/752)  
31 419 [initiative.org/studies/details/752](https://www.comet-initiative.org/studies/details/752) (accessed 29 Oct 2020).  
32  
33 420 20 Core Outcome Set for Melasma. <http://cs-cousin.org/melasma/> (accessed 29 Oct 2020).  
34  
35 421 21 Kirkham JJ, Gorst S, Altman DG, *et al.* Core Outcome Set-STANDARDISED Protocol Items: the  
36 422 COS-STAP Statement. *Trials* 2019;**20**:116. doi:10.1186/s13063-019-3230-x  
37  
38 423 22 Iyengar S, Williamson PR, Schmitt J, *et al.* Development of a core outcome set for clinical  
39 424 trials in rosacea: study protocol for a systematic review of the literature and identification of  
40 425 a core outcome set using a Delphi survey. *Trials* 2016;**17**:429. doi:10.1186/s13063-016-  
41 426 1554-3  
42  
43  
44 427 23 COMET Initiative | Outcome Classification. [http://www.comet-](http://www.comet-initiative.org/Resources/OutcomeClassification)  
45 428 [initiative.org/Resources/OutcomeClassification](http://www.comet-initiative.org/Resources/OutcomeClassification) (accessed 2 Oct 2020).  
46  
47 429 24 Lange T, Kottner J, Weberschock T, *et al.* Outcome assessment in dermatology clinical trials  
48 430 and cochrane reviews: call for a dermatology-specific outcome taxonomy. *J Eur Acad*  
49 431 *Dermatol Venereol JEADV* Published Online First: 11 August 2020. doi:10.1111/jdv.16854  
50  
51  
52 432 25 Guyatt GH, Oxman AD, Kunz R, *et al.* GRADE guidelines: 2. Framing the question and  
53 433 deciding on important outcomes. *J Clin Epidemiol* 2011;**64**:395–400.  
54 434 doi:10.1016/j.jclinepi.2010.09.012  
55  
56  
57  
58  
59

- 1  
2  
3 435 26 Harman NL, Bruce IA, Kirkham JJ, *et al.* The Importance of Integration of Stakeholder  
4 436 Views in Core Outcome Set Development: Otitis Media with Effusion in Children with Cleft  
5 437 Palate. *PLOS ONE* 2015;**10**:e0129514. doi:10.1371/journal.pone.0129514  
6  
7  
8 438 27 Guideline for Selecting Instruments for a Core Outcome Set • COSMIN. COSMIN.  
9 439 <https://www.cosmin.nl/tools/guideline-selecting-proms-cos/> (accessed 2 Oct 2020).  
10  
11 440  
12  
13  
14  
15  
16  
17  
18  
19  
20  
21  
22  
23  
24  
25  
26  
27  
28  
29  
30  
31  
32  
33  
34  
35  
36  
37  
38  
39  
40  
41  
42  
43  
44  
45  
46  
47  
48  
49  
50  
51  
52  
53  
54  
55  
56  
57  
58  
59  
60



**Table 1. CS-COUSIN Core Domain Development Process Guidance Checklist**

| Requirement                               | Item No. | Explanation                                                                                                                                                                                                                                                                                                                                                                       | Page            |
|-------------------------------------------|----------|-----------------------------------------------------------------------------------------------------------------------------------------------------------------------------------------------------------------------------------------------------------------------------------------------------------------------------------------------------------------------------------|-----------------|
| <b>Title/Abstract</b>                     |          |                                                                                                                                                                                                                                                                                                                                                                                   |                 |
| Title                                     | 1        | Identify in the title that the protocol is about the development of COS domains and specify disease / population of interest.                                                                                                                                                                                                                                                     | Pg 1            |
| Abstract                                  | 2        | Provide a structured summary.                                                                                                                                                                                                                                                                                                                                                     | Pg 3            |
| <b>Introduction</b>                       |          |                                                                                                                                                                                                                                                                                                                                                                                   |                 |
| Scientific background and relevance       | 3        | Provide an overview of the need of the COS (more detailed than in the proposal form).                                                                                                                                                                                                                                                                                             | Pg 6            |
| Objectives                                | 4        | State your objectives.                                                                                                                                                                                                                                                                                                                                                            | Pg 7            |
| Define scope and applicability of the COS | 5        | Describe the setting(s) including geographical region, health condition(s), population(s), and intervention(s).                                                                                                                                                                                                                                                                   | Pg 7            |
| <b>Methods</b>                            |          |                                                                                                                                                                                                                                                                                                                                                                                   |                 |
| Workplan and milestones                   | 6        | Describe work packages (e.g. protocol development, registration, literature search, databases). Specify the expected results of each work package. Provide the milestones (planned timelines for the work packages).                                                                                                                                                              | Beginning pg. 8 |
| COS development group                     | 7        | Describe the COS project team consisting of at least patients, clinicians, and methodologists (and if applicable, Steering Committee and/or Advisory group members).                                                                                                                                                                                                              | Pg 8            |
| Method for involving Stakeholders         | 8        | Describe who your stakeholders will be and how stakeholders will be contacted and involved. Describe the eligibility criteria for stakeholders for each group. Describe in detail how you will involve the patient perspective, healthcare professionals and provide (if possible at this stage) a list of potential representatives and stakeholders: names, affiliation, roles. | Pg 9-10         |
| Method for the <u>identification</u> of   | 9        | Provide a detailed plan for the identification of the core outcome domains (e.g. literature searches, focus groups, interviews).                                                                                                                                                                                                                                                  | Pg 9            |

|                                                                                            |    |                                                                                                                                                                                                                                                                                                                                                                           |          |
|--------------------------------------------------------------------------------------------|----|---------------------------------------------------------------------------------------------------------------------------------------------------------------------------------------------------------------------------------------------------------------------------------------------------------------------------------------------------------------------------|----------|
| core outcome domains                                                                       |    |                                                                                                                                                                                                                                                                                                                                                                           |          |
| Consensus Process and Definition, Method for the <u>definition</u> of core outcome domains | 10 | Provide a detailed plan for conducting the consensus process (e.g. Delphi study, face to face group meetings).<br><br>Describe the proposed consensus definition.<br><br>Describe the analysis plan (i.e. how outcome domains will be scored and how scores will be summarized).<br>Describe the consensus definition and criteria for including/dropping/adding domains. | Pg 10-12 |
| Ethics and consent                                                                         | 11 | Describe the ethics and consent issues. If this is not applicable please state this.                                                                                                                                                                                                                                                                                      | Pg 15    |
| Results                                                                                    | 12 | Describe broadly how you will present your expected results.                                                                                                                                                                                                                                                                                                              | Pg 15    |
| <b>Other Information</b>                                                                   |    |                                                                                                                                                                                                                                                                                                                                                                           |          |
| Dissemination and Publication                                                              | 13 | Develop a dissemination and implementation plan.                                                                                                                                                                                                                                                                                                                          | Pg 15    |
| Future research plan for developing a core set of outcome measurement instruments          | 14 | Indicate if you intend to develop a core set of outcome measurement instruments for your identified core outcome domains and how you would do this.                                                                                                                                                                                                                       | N/A      |
| Funding, Conflict of interest                                                              | 15 | State any sources of funding that you have received or plan to apply for and conflicts of interest (e.g. development or copyright for any instruments in this area, involvement in any other COS, involvement in any related groups).                                                                                                                                     | Pg 17    |
| Timeline                                                                                   | 16 | Please indicate the intended timeline from the study start until the Core Set of outcome domains will be completed                                                                                                                                                                                                                                                        | Pg 14    |

**Table 2. COS-STAP (The Core Outcome Set-STANDARDISED Protocol Items) Statement Checklist**

| REQUIREMENT               |    |                                                                                                                                                                                                                                                                                       | Page     |
|---------------------------|----|---------------------------------------------------------------------------------------------------------------------------------------------------------------------------------------------------------------------------------------------------------------------------------------|----------|
| TITLE/ABSTRACT            |    |                                                                                                                                                                                                                                                                                       |          |
| Title                     | 1a | Identify in the title that the paper describes the protocol for the planned development of a COS                                                                                                                                                                                      | Pg 1     |
| Abstract                  | 1b | Provide a structured abstract                                                                                                                                                                                                                                                         | Pg 3     |
| INTRODUCTION              |    |                                                                                                                                                                                                                                                                                       |          |
| Background and objectives | 2a | Describe the background and explain the rationale for developing the COS and identify the reasons why a COS is needed and the potential barriers to its implementation.                                                                                                               | Pg 6     |
|                           | 2b | Describe the specific objectives with reference to developing a COS                                                                                                                                                                                                                   | Pg 7     |
| Scope                     | 3a | Describe the health condition(s) and population(s) that will be covered by the COS                                                                                                                                                                                                    | Pg 7     |
|                           | 3b | Describe the intervention(s) that will be covered by the COS                                                                                                                                                                                                                          | Pg 7     |
|                           | 3c | Describe the context of use for which the COS is to be applied                                                                                                                                                                                                                        | Pg 7     |
| METHODS                   |    |                                                                                                                                                                                                                                                                                       |          |
| Stakeholders              | 4  | Describe the stakeholder groups to be involved in the COS development process, the nature of and rationale for their involvement and also how the individuals will be identified; this should cover involvement both as members of the research team and as participants in the study | Pg 9-10  |
| Information sources       | 5a | Describe the information sources that will be used to identify the list of outcomes. Outline the methods or reference other protocols/papers                                                                                                                                          | Pg 9     |
|                           | 5b | Describe how outcomes may be dropped/combined, with reasons                                                                                                                                                                                                                           | Pg 10    |
| Consensus process         | 6  | Describe the plans for how the consensus process will be undertaken                                                                                                                                                                                                                   | Pg 10-12 |
| Consensus definition      | 7a | Describe the consensus definition                                                                                                                                                                                                                                                     | Pg 13    |

|                                  |    |                                                                                                                                                                                                      |           |
|----------------------------------|----|------------------------------------------------------------------------------------------------------------------------------------------------------------------------------------------------------|-----------|
|                                  | 7b | Describe the procedure for determining how outcomes will be added/combined/dropped from consideration during the consensus process                                                                   | Pg 13     |
| ANALYSIS                         |    |                                                                                                                                                                                                      |           |
| Outcome scoring/feedback         | 8  | Describe how outcomes will be scored and summarised, describe how participants will receive feedback during the consensus process                                                                    | Pg 10     |
| Missing data                     | 9  | Describe how missing data will be handled during the consensus process                                                                                                                               | Pg 13     |
| ETHICS and DISSEMINATION         |    |                                                                                                                                                                                                      |           |
| Ethics approval/informed consent | 10 | Describe any plans for obtaining research ethics committee/institutional review board approval in relation to the consensus process and describe how informed consent will be obtained (if relevant) | Pg 15     |
| Dissemination                    | 11 | Describe any plans to communicate the results to study participants and COS users, inclusive of methods and timing of dissemination                                                                  | Pg 15     |
| ADMINISTRATIVE INFORMATION       |    |                                                                                                                                                                                                      |           |
| Funders                          | 12 | Describe sources of funding, role of funders                                                                                                                                                         | Pg 17     |
| Conflicts of interest            | 13 | Describe any potential conflicts of interest within the study team and how they will be managed                                                                                                      | Pg 17 -18 |

# BMJ Open

## Protocol for Development of a Core Outcome Set for Clinical Trials in Melasma

|                                 |                                                                                                                                                                                                                                                                                                                                                                                                                                                                                                                                                                                                                                                                                                                                                                                                                                                                                                                                  |
|---------------------------------|----------------------------------------------------------------------------------------------------------------------------------------------------------------------------------------------------------------------------------------------------------------------------------------------------------------------------------------------------------------------------------------------------------------------------------------------------------------------------------------------------------------------------------------------------------------------------------------------------------------------------------------------------------------------------------------------------------------------------------------------------------------------------------------------------------------------------------------------------------------------------------------------------------------------------------|
| Journal:                        | <i>BMJ Open</i>                                                                                                                                                                                                                                                                                                                                                                                                                                                                                                                                                                                                                                                                                                                                                                                                                                                                                                                  |
| Manuscript ID                   | bmjopen-2020-046953.R1                                                                                                                                                                                                                                                                                                                                                                                                                                                                                                                                                                                                                                                                                                                                                                                                                                                                                                           |
| Article Type:                   | Protocol                                                                                                                                                                                                                                                                                                                                                                                                                                                                                                                                                                                                                                                                                                                                                                                                                                                                                                                         |
| Date Submitted by the Author:   | 12-May-2021                                                                                                                                                                                                                                                                                                                                                                                                                                                                                                                                                                                                                                                                                                                                                                                                                                                                                                                      |
| Complete List of Authors:       | Ibrahim, Sarah; Northwestern University Feinberg School of Medicine, Dermatology<br>Kang, Bianca; Northwestern University Feinberg School of Medicine, Dermatology<br>Schlessinger, Daniel; Washington University in St Louis, Dermatology<br>Chiren, Sarah; Northwestern University Feinberg School of Medicine, Dermatology<br>Tang, Jennifer; University of Miami Miller School of Medicine<br>Kirkham, Jamie J.; Manchester University, Biostatistics<br>Schmitt, Jochen; Medical Faculty Carl Gustav Carus, Technical University<br>Dr.esden, Center for Evidence-based Healthcare<br>Poon, Emily; Northwestern University Feinberg School of Medicine, Dermatology<br>Maher, Ian; University of Minnesota<br>Sobanko, Joseph; University of Pennsylvania Health System<br>Cartee, Todd; Penn State Health Milton S Hershey Medical Center<br>Alam, Murad; Northwestern University Feinberg School of Medicine, Dermatology |
| <b>Primary Subject Heading</b>: | Dermatology                                                                                                                                                                                                                                                                                                                                                                                                                                                                                                                                                                                                                                                                                                                                                                                                                                                                                                                      |
| Secondary Subject Heading:      | Research methods                                                                                                                                                                                                                                                                                                                                                                                                                                                                                                                                                                                                                                                                                                                                                                                                                                                                                                                 |
| Keywords:                       | Protocols & guidelines < HEALTH SERVICES ADMINISTRATION & MANAGEMENT, Clinical trials < THERAPEUTICS, DERMATOLOGY                                                                                                                                                                                                                                                                                                                                                                                                                                                                                                                                                                                                                                                                                                                                                                                                                |
|                                 |                                                                                                                                                                                                                                                                                                                                                                                                                                                                                                                                                                                                                                                                                                                                                                                                                                                                                                                                  |

SCHOLARONE™  
Manuscripts

# 1 Protocol for Development of a Core Outcome Set for Clinical Trials in 2 Melasma

3 Sarah A. Ibrahim, BA<sup>1</sup>; Bianca Y. Kang, BS<sup>1</sup>; Daniel I. Schlessinger, MD<sup>2</sup>; Sarah G. Chiren,  
4 BA<sup>1</sup>; Jennifer C. Tang, MD<sup>3</sup>; Jamie J. Kirkham, PhD<sup>4</sup>; Jochen Schmitt, MD<sup>5</sup>; Emily Poon,  
5 PhD<sup>1</sup>; Ian A. Maher, MD<sup>6</sup>; Joseph F. Sobanko, MD<sup>7,8</sup>; Todd V. Cartee, MD<sup>9</sup>; Murad Alam, MD,  
6 MSCI, MBA<sup>1,10,11</sup>

7 <sup>1</sup>Department of Dermatology, Feinberg School of Medicine, Northwestern University, Chicago,  
8 IL, USA.

9 <sup>2</sup>Division of Dermatology, Department of Internal Medicine, Washington University in St.  
10 Louis, St. Louis, MO, USA.

11 <sup>3</sup>Department of Dermatology and Cutaneous Surgery, University of Miami Miller School of  
12 Medicine, Miami, FL, USA.

13 <sup>4</sup>Centre for Biostatistics, Manchester Academic Health Science Centre, University of  
14 Manchester, Manchester, United Kingdom.

15 <sup>5</sup>Centre for Evidence-Based Healthcare, Medizinische Fakultät Carl Gustav Carus, TU Dresden,  
16 Dresden, Germany.

17 <sup>6</sup>Department of Dermatology, University of Minnesota, Minneapolis, MN, USA.

18 <sup>7</sup>Department of Dermatology, University of Pennsylvania, Philadelphia, PA, USA.

19 <sup>8</sup>Division of Dermatologic Surgery, University of Pennsylvania, Philadelphia, PA, USA.

20 <sup>9</sup>Department of Dermatology, Penn State Health, Hershey, PA, USA.

21 <sup>10</sup>Department of Otolaryngology, Feinberg School of Medicine, Northwestern University,  
22 Chicago, IL, USA.

23 <sup>11</sup>Department of Surgery, Feinberg School of Medicine, Northwestern University, Chicago, IL,  
24 USA.

## 25 Corresponding Author:

26 Murad Alam, MD  
27 Northwestern University Department of Dermatology  
28 676 N. St. Clair, Suite 1600  
29 Chicago, Illinois 60611  
30 Phone: (312) 695-6647; Fax: (312) 695-0044  
31 [m-alam@northwestern.edu](mailto:m-alam@northwestern.edu)

1  
2  
3 444 **Word Count** Abstract: 298 Manuscript: 3422/4000

5 46

6 **Keywords:** core outcome set, protocol, development, clinical trials, melasma7 48  
8  
9  
10  
11  
12  
13  
14  
15  
16  
17  
18  
19  
20  
21  
22  
23  
24  
25  
26  
27  
28  
29  
30  
31  
32  
33  
34  
35  
36  
37  
38  
39  
40  
41  
42  
43  
44  
45  
46  
47  
48  
49  
50  
51  
52  
53  
54  
55  
56  
57  
58  
59  
60

For peer review only

1  
2  
3 49 **ABSTRACT**

4  
5 50 **Introduction:** Melasma is a pigmentation disorder of the skin. Characterized by brown to gray-  
6  
7 brown patches on the face and neck, the condition predominantly affects women and has been  
8  
9 associated with pregnancy, hormonal variation, and sun exposure. Melasma can be disfiguring  
10  
11 52 associated with pregnancy, hormonal variation, and sun exposure. Melasma can be disfiguring  
12  
13 53 and anxiety-provoking, and quality of life is often adversely impacted. Management includes sun  
14  
15 54 protection, laser and energy device therapy, topical and oral skin-bleaching agents, and chemical  
16  
17 55 peels. While clinical trials of melasma exist, there is a lack of consistency in reported outcomes,  
18  
19 56 which has been a barrier to the aggregation of data in systematic reviews and meta-analyses. This  
20  
21 57 protocol describes a planned process for development of a minimum set of outcomes (i.e., “core  
22  
23 58 outcome set”) that should be measured in all clinical trials of melasma.

24  
25  
26 59 **Methods and Analysis:** An exhaustive list of potential outcomes will be extracted from four  
27  
28 60 sources: 1) systematic literature review of outcomes in clinical trials; 2) semi-structured patient  
29  
30 61 interviews; 3) brochures, pamphlets, clinical trial registries, and other published and unpublished  
31  
32 62 sources and documentation; and 4) interviews with non-patient, non-physician stakeholders,  
33  
34 63 including federal regulators, industry scientists, and non-physician providers. An international  
35  
36 64 two-round Delphi process will then be performed to identify the outcomes deemed most  
37  
38 65 important to patients and physicians. Subsequently, a consensus meeting will be convened to  
39  
40 66 review and process the results, and to vote on a final set of core outcomes.

41  
42  
43  
44 67 **Ethics and Dissemination:** Ethics approval was provided by the Northwestern University  
45  
46 68 Institutional Review Board (IRB) (protocol ID: STU00201637). This study is registered with  
47  
48 69 both the COMET and CS-COUSIN initiatives, and this protocol is in accordance with the  
49  
50 70 guidelines for protocol development of both groups. All findings from the study described in this  
51  
52  
53  
54  
55  
56  
57  
58  
59  
60



1  
2  
3 71 protocol will be disseminated to all stakeholders involved in the development process and will be  
4  
5 72 submitted for publication in peer-reviewed journals.  
6  
7  
8 73  
9  
10  
11  
12  
13  
14  
15  
16  
17  
18  
19  
20  
21  
22  
23  
24  
25  
26  
27  
28  
29  
30  
31  
32  
33  
34  
35  
36  
37  
38  
39  
40  
41  
42  
43  
44  
45  
46  
47  
48  
49  
50  
51  
52  
53  
54  
55  
56  
57  
58  
59  
60

1  
2  
3 74 **ARTICLE SUMMARY**  
4

5 75 **Strengths and Limitations of This Study**  
6  
7

- 8 76 • This protocol describes a planned process for the development of a minimum set of  
9  
10 77 outcomes (i.e., “core outcome set”) that should be measured in all clinical trials of  
11  
12 78 melasma.  
13  
14 79 • A long list of potential outcomes will be extracted from a systematic literature review,  
15  
16 80 semi-structured interviews, brochures and pamphlets, clinical trial registries, and other  
17  
18 81 published and unpublished sources and documentation.  
19  
20 82 • An international group of stakeholders, including patients, physicians, federal regulators,  
21  
22 83 industry scientists, pharmacologists and pharmacists, nurses, and non-physician providers  
23  
24 84 will be included in the process.  
25  
26 85 • At least two rounds of Delphi process will then be performed to identify a provisional list  
27  
28 86 of outcomes meeting a 70% consensus level for patient and physicians, followed by the  
29  
30 87 convening of a consensus meeting to review and process the results, and to vote on a final  
31  
32 88 set of core outcomes.  
33  
34 89 • This COS will establish “what” should be measured, but not “how” or “when,” which  
35  
36 90 will be defined in later development of core outcome measure set for melasma.  
37  
38  
39  
40  
41  
42  
43  
44 91  
45  
46  
47  
48  
49  
50  
51  
52  
53  
54  
55  
56  
57  
58  
59  
60

## 92 INTRODUCTION

93 Melasma is a chronic hyperpigmentation disorder primarily occurring in women.<sup>1,2</sup> The  
94 condition is characterized by brown, irregularly shaped macules and patches, commonly of the  
95 bilateral upper cheeks, mid forehead, and upper lip. Predisposing risk factors for the  
96 development of melasma include darker skin types III and IV, genetic predisposition, ultraviolet  
97 radiation, and hormonal changes due to pregnancy, menopause, or medications.<sup>3-5</sup> However,  
98 melasma remains a poorly understood condition that also arises in the absence of traditional risk  
99 factors, with a significant minority of cases occurring in men.<sup>6</sup> Histologically, there is an  
100 increase of melanocytes and solar elastosis in the epidermis of melasma lesions compared to  
101 normal skin.<sup>2,4,7</sup> Due to its sometimes striking impact on cosmetic appearance, melasma can  
102 cause psychological distress, thereby negatively affecting quality of life.<sup>3</sup>

103 Melasma is typically divided into three subtypes (epidermal, dermal, or mixed) and can  
104 be classified via Wood's Lamp examination. Severity of lesions and area of involvement can be  
105 assessed using validated or more *ad hoc* measurement tools. Melasma has been treated with  
106 various modalities, including lasers and lights, chemical peels, skin-bleaching agents, such as  
107 hydroquinone, or oral agents, like tranexamic acid.<sup>1,8</sup> However, current treatments are of limited  
108 efficacy and recurrence is the norm. Additionally, extant studies seldom assess patient-reported  
109 outcomes, which are particularly relevant given the disfiguring nature of melasma.

110 Systematic reviews of treatments for melasma are limited in utility by the lack of  
111 standardization in outcomes across trials.<sup>8</sup> The selective inclusion of outcomes in publications,  
112 so-called selective outcome reporting bias, remains a problem in the reporting of clinical trials.  
113 In particular, the heterogeneity of outcomes reported across trials may affect the  
114 recommendations and conclusions of systematic reviews.<sup>9</sup> In order to address the heterogeneity

1  
2  
3 115 of outcomes in clinical trials of the same disease or condition, The Core Outcome Measures in  
4  
5 116 Effectiveness Trials (COMET) initiative was created, with the goal of providing methodological  
6  
7  
8 117 support to facilitate development of standardized core outcome sets to be measured in health-  
9  
10 118 related research.<sup>10</sup> A core outcome set (COS) is defined as a consensus-derived set of outcomes  
11  
12 119 that are measured at minimum in all clinical studies of a given condition or disease. Similarly,  
13  
14 120 another group, the Cochrane Skin - Core Outcome Set Initiative (CS-COUSIN), was developed  
15  
16 121 specifically to address core outcome sets in dermatology.<sup>11</sup> CS-COUSIN provides  
17  
18 122 methodological support, and much of its approach is based on the experience of the Harmonizing  
19  
20 123 Outcome Measures for Eczema (HOME) initiative.<sup>12-16</sup>

21  
22  
23  
24 124 To date, there has been no core outcome set published specifically for melasma. The data  
25  
26 125 obtained from the investigation described in this protocol will define the minimum set of  
27  
28 126 outcomes that should be reported in future clinical trials of melasma interventions.

### 31 127 **Objective**

32  
33  
34 128 The aim of this study will be to develop a COS through an international consensus  
35  
36 129 process, for use in future clinical trials of melasma. The objective is to determine what outcomes  
37  
38 130 should be reported as a minimum in future clinical trials of melasma.

### 41 131 **Scope of this COS**

42  
43  
44  
45 132 This COS is envisioned as the global standard for all clinical trials examining the efficacy  
46  
47 133 and safety of all melasma interventions, including both early and late phase trials. The COS to be  
48  
49 134 developed is intended to apply to all individuals with melasma, regardless of age, gender, and  
50  
51 135 ethnicity.

1  
2  
3 136 This COS will establish “what” should be measured, but not “how” or “when,” which  
4  
5  
6 137 will be defined in a later consensus study specific to outcome measures.  
7

## 8 138 **METHODS AND ANALYSIS**

9  
10 139 This study was designed using guidance provided by the CS-COUSIN and COMET  
11  
12  
13 140 initiatives and has been registered with both organizations.<sup>17–20</sup> Additional guidance was  
14  
15 141 provided by the Harmonising Outcome Measures for Eczema (HOME) roadmap.<sup>16</sup> The reporting  
16  
17 142 of this protocol conforms to the COS-STAP (The Core Outcome Set-STANDARDISED Protocol  
18  
19 143 Items) Statement checklist and the CS-COUSIN Core Domain Development Process  
20  
21  
22 144 guidance.<sup>18,21</sup> This protocol is also based on prior work in protocol development by the  
23  
24 145 Measurement of Priority Outcome Variables in Dermatologic Surgery (IMPROVED) Group, a  
25  
26 146 core outcome set development organization for dermatologic surgery-related conditions.<sup>22</sup>  
27  
28

### 29 147 **Study Oversight**

30  
31 148 The international study steering committee developing this COS will include four  
32  
33 149 physicians (MA, IAM, JFS, TVC) as well as a patient representative. The latter, who will also  
34  
35 150 have melasma, will represent others with this condition by providing input at key points to  
36  
37 151 ensure that the patient perspective is incorporated. The four physicians have prior experience in  
38  
39 152 developing core outcome sets in dermatology and therefore also act as researchers in COS  
40  
41 153 development. The steering committee will lead each stage of COS development and ensure  
42  
43 154 methodological quality throughout the study. In addition, an independent member of the CS-  
44  
45 155 COUSIN Methods Group (JJK) will provide guidance on the most current methodological  
46  
47 156 recommendations for COS development.  
48  
49  
50

### 51 157 **Study Design**

#### 52 158 *Identification of Outcomes*

1  
2  
3 159 A long list of outcomes will be generated from four sources. First, a systematic review of  
4  
5 160 the literature, which has been registered prospectively with the International Prospective Register  
6  
7 161 of Systematic Reviews (PROSPERO, CRD42020214189), will be performed to identify and  
8  
9  
10 162 extract outcomes measured in randomized controlled trials of melasma. Specifically, with the  
11  
12 163 help of a medical librarian, PubMed/Medline and Embase will be searched for the period 2006-  
13  
14 164 16 to detect English language human RCTs including, but not limited to, the following terms:  
15  
16  
17 165 [(melasma [title/abstract]) AND (randomized controlled trial [publication type]) AND (treatment  
18  
19 166 OR therapy OR therapeutics)]. RCTs will be used to identify outcomes of interest, since it is  
20  
21 167 usual and customary in COS methodology to focus on RCTs when they are available in  
22  
23 168 sufficient variety and quantity.<sup>23-26</sup> Inclusion criteria will be studies that: (1) are randomized and  
24  
25 169 controlled; (2) assess the efficacy and/or safety of one or more interventions for treatment of  
26  
27 170 melasma; (3) are available in the English language; (4) and involve human subjects. Articles will  
28  
29 171 be excluded if they: (1) were published as a poster or conference abstract; or (2) the full text of  
30  
31 172 the article is unavailable. Articles will be independently screened for eligibility by two  
32  
33 173 investigators, and disagreements will be resolved by a third investigator. Two independent  
34  
35 174 reviewers will then extract outcomes from individual studies. During extraction, quality of life  
36  
37 175 (QoL) outcomes will be separated into distinct categories to ensure all of the various components  
38  
39 176 of QoL that have been measured in previous investigations are included as possible core  
40  
41 177 outcomes. Outcome measures will also be extracted during this step, and this data will be  
42  
43 178 recorded for the future development of a core outcome measure set for melasma.<sup>27</sup> The results of  
44  
45 179 the systematic review will be published separately from the COS.  
46  
47  
48  
49  
50  
51  
52  
53  
54  
55  
56  
57  
58  
59  
60

1  
2  
3 180 Second, other printed and electronic sources, including clinical trial registries,<sup>1</sup> patient  
4  
5 181 pamphlets,<sup>2</sup> medical society brochures, and relevant FDA/EMA guidance documents, will be  
6  
7 182 reviewed to identify any additional outcomes not detected in the systematic review. Third,  
8  
9  
10 183 outcomes valued by patients will be identified by conducting semi-structured interviews with  
11  
12 184 patients diagnosed with melasma.<sup>3</sup> These interviews will be audio-recorded, transcribed, and  
13  
14 185 analyzed by the methods of qualitative research to find outcomes considered relevant by patients.  
15  
16  
17 186 Fourth, semi-structured interviews will be performed to identify any remaining outcomes  
18  
19 187 deemed relevant by representatives of key non-physician, non-patient stakeholder classes,  
20  
21 188 including industry scientists,<sup>4</sup> pharmacologists and pharmacists, drug and device safety  
22  
23 189 regulators<sup>5</sup>, nurses, and physician assistants. Semi-structured interviews with patients and other  
24  
25 190 stakeholders will be conducted by investigators who have been trained in this qualitative  
26  
27 191 research technique. Specifically, such interviews will be comprised of a series of open-ended  
28  
29 192 questions, followed by pre-established prompts, in the event that respondents are unclear as to  
30  
31 193 the primary question. At the end of the semi-structured interview, stakeholders will be asked to  
32  
33  
34  
35

---

36  
37 <sup>1</sup> Clinicaltrials.gov searched for “melasma”, 2017-2021, no exclusion criteria.

38  
39 <sup>2</sup> American Academy of Dermatology website searched for “melasma”, with inclusion criteria being “all patient  
40 education material”, and no exclusion criteria.

41  
42 <sup>3</sup> The Electronic Data Warehouse (EDW) of outpatient dermatology clinics at Northwestern University will be  
43 searched to identify patients who have received consultations or treatments for melasma. At least 20 patients will be  
44 contacted by telephone for interviews. Those who agree to respond will each be scheduled via email for a 30-minute  
45 interview.

46  
47 <sup>4</sup> Leaders at a purposive sample of large, medium-sized, and small US drug, device, and cosmetic companies  
48 involved in research on products for melasma will be contacted to ask for identification of qualified industry  
49 scientists in their employ who can help identify additional outcomes. In total, up to 20 industry scientists will be  
50 contacted.

51  
52 Drug and device safety regulators from the countries most represented in the systematic review will be contacted for  
53 interviews. When their names are publicly available, officials from dermatology or cosmetic-related offices within  
54 these regulatory agencies will be contacted first.

55  
56 <sup>5</sup> US Food and Drug Administration, European Medicines Agency, Ministry of Food and Drug Safety (Korean),  
57 Pharmaceuticals and Medical Devices Agency (Japan), Health Canada, Brazilian Health Regulatory Agency  
58 (ANVISA).  
59

1  
2  
3 194 volunteer any additional information about the topic that they may wish to share. Interviewers  
4  
5 195 will be strictly prohibited from using off-script leading questions that may bias data collection.  
6  
7 196 After the semi-structured interviews are completed, they will be transcribed, and the iterative  
8  
9  
10 197 methods of qualitative methods will be used to extract common themes. These themes, if not  
11  
12 198 already present in the list of outcomes, will then be used to create new outcomes that will be  
13  
14 199 appended to the long list. Non-physician, non-patient stakeholders will not be invited to  
15  
16  
17 200 participate in the subsequent Delphi process but will be invited to the final consensus meeting.  
18  
19

### 20 *Final Review of Long List of Outcomes*

21  
22  
23 202 The outcomes obtained from the sources above will be collated into a long list of  
24  
25 203 provisional outcomes. Members of the steering committee will review and condense this list,  
26  
27 204 eliminating duplicate items and combining items when possible, without loss of content. In  
28  
29 205 accordance with the proposed definition of a unique outcome by Young et al., unique outcomes  
30  
31 206 (i.e., outcomes with “original meaning and context”) will be preserved, and other outcomes (i.e.,  
32  
33 207 those “with different words, phrasing, or spelling addressing the same concept and context”) will  
34  
35  
36 208 be lumped together.<sup>28</sup> The list of outcomes will then be placed into appropriate domains by two  
37  
38 209 steering committee members using the COMET and CS-COUSIN taxonomies.<sup>29,30</sup> Lay  
39  
40 210 definitions will be appended to all outcomes and reviewed by the melasma steering group patient  
41  
42  
43 211 representative to assure that patient stakeholders can actively participate in the forthcoming  
44  
45  
46 212 Delphi consensus process.  
47  
48

### 49 *Delphi Participants*

50  
51  
52 214 Two separate groups, consisting of physicians and patients, respectively, will be invited  
53  
54 215 to take part in the Delphi process. A global context will be provided by inviting physicians from  
55  
56  
57  
58  
59



1  
2  
3 216 the United States and from other countries on various continents, including a range of ethnicities.  
4  
5 217 To include the perspective of researchers, the senior authors of all clinical trials extracted in our  
6  
7 218 literature review will be included in the physician group. Eligible physician stakeholders will  
8  
9 219 include dermatologists, clinical researchers, primary care providers, and other medical specialists  
10  
11 220 who have experience treating melasma. Demographic information, including participants'  
12  
13 221 ethnicity, gender, and specialty will be recorded. To account for potential dropouts, at least 100  
14  
15 222 physicians meeting any of the following criteria will be invited: corresponding author of a  
16  
17 223 clinical trial of melasma included in our systematic review; among the most frequently  
18  
19 224 published authors on melasma treatment, as identified through electronic databases; recent  
20  
21 225 lecturer on the topic of melasma at national or international dermatology professional society  
22  
23 226 meetings in any country; or a member of a national or international dermatologic society<sup>6</sup> with  
24  
25 227 clinical expertise in melasma treatment, as demonstrated by committee or other affiliations.  
26  
27  
28  
29  
30

31 228 Physicians who agree to participate will be asked to identify one or more melasma  
32  
33 229 patients who may be invited to join the patient Delphi group, with a goal of 15 patient  
34  
35 230 stakeholders participating in the Delphi. All recruitment will be done by our study team and will  
36  
37 231 be approved by our ethics committee. However, this will not entail limiting patient recruitment  
38  
39 232 from our site only, since we will be asking physician Delphi participants located elsewhere to  
40  
41 233 volunteer patients who may choose to participate in the study. Such patient volunteers will  
42  
43  
44  
45

---

46  
47 <sup>6</sup> Representative board members of the following societies will be invited to participate as individuals in the Delphi  
48 to ensure inclusion of the perspectives of expert clinicians and researchers who may not have recently published in  
49 the literature: American Academy of Dermatology Association; American Society for Laser Medicine and Surgery;  
50 African Society of Dermatology and Venerology; Asian Academy of Dermatology and Venereology; Arab  
51 Academy of Dermatology and Aesthetics; Argentine Society of Dermatology; Brazilian Society of Dermatology;  
52 British Association of Dermatologists; Canadian Dermatology Association; European Academy of Dermatology and  
53 Venereology; French Society of Dermatology; Mexican Society of Dermatology; Skin of Color Society; World  
54 Congress of Dermatology.  
55  
56  
57  
58  
59  
60

1  
2  
3 234 contact the research staff at our site, who will consent and enroll them, if appropriate. Additional  
4  
5 235 methods will be taken to ensure patient involvement throughout the study, including: (1)  
6  
7 236 specifying patient involvement in the Institutional Review Board (IRB) protocol; (2) seeking  
8  
9 237 relevant input from patients; (3) maintenance of investigator open-mindedness to the patient  
10  
11 238 perspective; (4) careful reviewing of all outcomes with patient representatives; (5) thorough note  
12  
13 239 taking; (6) taking time to reflect on patient feedback; and (7) identifying and engaging a diverse  
14  
15 240 group of patient participants.<sup>31</sup>  
16  
17  
18  
19

#### 20 241 *Modified Delphi Process*

21  
22  
23 242 From the long list of potential outcomes vetted by the steering committee, a core set of  
24  
25 243 outcomes will be provisionally selected by stakeholders through a Delphi process, as  
26  
27 244 recommended by the COMET and CS-COUSIN initiatives.<sup>17,18,30</sup> Specifically, each Delphi  
28  
29 245 participant will be asked to rate each outcome for its level of importance on a scale from 1-9.  
30  
31 246 Average ratings for each outcome, and relevant participant comments, will then be redistributed  
32  
33 247 to each survey participant, who will have the option of changing his or her earlier ratings based  
34  
35 248 on the additional information surfaced in this process. Prior to a consensus meeting, at least two  
36  
37 249 Delphi rounds will be conducted using DelphiManager software available for this purpose from  
38  
39 250 COMET.  
40  
41  
42  
43

#### 44 251 *Delphi Rounds*

45  
46  
47 252 During each Delphi round, the provisional outcomes in the long list will be presented to  
48  
49 253 each participant for rating. Participants will rate each outcome on a 9-point scale developed by  
50  
51 254 the Grading of Recommendations Assessment, Development and Evaluation (GRADE) working  
52  
53 255 group, with “9” denoting “critically important” and “1,” “not that important.”<sup>32</sup> In each round,  
54  
55  
56  
57  
58  
59

1  
2  
3 256 each participant will have the option to select “10” if they are uncertain about an outcome’s need  
4  
5 257 for inclusion. Also in each round, each participant will have the option to identify new outcomes  
6  
7 258 that they feel should be added in the subsequent round. All previously included outcomes will be  
8  
9  
10 259 carried to the next round. Participants will have 3 weeks to complete each Delphi round, and will  
11  
12 260 receive weekly reminders until they do, or time expires.  
13  
14

15 261 Results from Round 1 will be analyzed by outcome and for each stakeholder group.  
16  
17 262 After Round 1, a virtual meeting will be held with participants to discuss the results of the first  
18  
19 263 round, and to allow participants to share their thoughts about items they found particularly  
20  
21 264 salient or controversial. Then, Round 2 will commence. In Round 2, participants will be  
22  
23 265 graphically shown the distribution of scores for each item for each stakeholder group from  
24  
25 266 Round 1, and also their own individual ratings for each outcome from the previous round, and  
26  
27 267 asked to score each item again. New outcomes will be added to Round 2 if suggested by two or  
28  
29 268 more participants in Round 1, if the steering committee determines the suggested outcome(s) to  
30  
31 269 be unique from existing outcomes.<sup>28</sup>  
32  
33  
34  
35

36 270 Summarized scores from Round 2, analyzed by outcome and for each stakeholder group,  
37  
38 271 will be presented at the consensus meeting. Attrition is possible between Delphi rounds, and  
39  
40 272 although numeric data (e.g., mean, median, and range of scores) from Round 2 alone will be  
41  
42 273 analyzed and presented at the consensus meeting, written feedback from both rounds will be  
43  
44 274 collated and discussed at the consensus meeting, as well.  
45  
46  
47

#### 48 275 *Definition of Provisional Consensus*

49

50 276 Outcomes will be *retained* in the provisional consensus pool if 70% of the participants  
51  
52 277 score 7, 8, or 9 with less than 15% scoring 1-3.<sup>33</sup> Outcomes will be *removed* from the provisional  
53  
54 278 consensus pool if 70% or more of the participants score 1, 2, or 3 and less than 15% score 7- 9.  
55  
56  
57  
58  
59  
60

1  
2  
3 279 The definition of consensus is based on previous, published COS consensus methodology, and  
4  
5 280 guidance of the COMET Methodology Group.<sup>17,34–36</sup> Outcomes that have not reached consensus  
6  
7  
8 281 will also be retained for discussion during the consensus meeting.  
9

### 10 282 *Consensus Meeting*

11  
12  
13  
14 283 A virtual consensus meeting will be held to discuss the results of Delphi, to review the  
15  
16 284 provisional core outcome set as well as the outcomes for which consensus has not be reached,  
17  
18 285 and to move towards selection of a final core outcome set. This meeting will be moderated by an  
19  
20 286 independent facilitator, and invited participants will include all physicians and patients who  
21  
22 287 participated in at least the first round of the Delphi. If time constraints and other limitations  
23  
24 288 preclude a single consensus meeting, multiple virtual consensus meetings will be held, with each  
25  
26 289 having balanced representation across stakeholder groups and geographic regions to ensure the  
27  
28 290 result is development of a global COS. In total, the meeting(s) will aim to include 30 to 60  
29  
30 291 physicians and at least 5 patients. Other non-physician, non-patient stakeholders will be invited,  
31  
32 292 as well.  
33  
34  
35

36  
37 293 Informed by the Delphi results, feedback regarding the consensus-derived set of  
38  
39 294 provisional outcomes and outcomes for which consensus has not been reached will be elicited  
40  
41 295 from the consensus meeting participants with the assistance of the facilitator. Using live polling  
42  
43 296 software, participants will vote to include or not include outcomes into the final core set of  
44  
45 297 outcomes. If multiple consensus meetings are held, and if there is any inconsistency between the  
46  
47 298 outcomes selected in these, a final email ballot will be circulated to all consensus meeting  
48  
49 299 participants to confirm the final COS. The result will be a core outcome set that reflects the  
50  
51 300 priorities and concerns of all stakeholders.  
52  
53  
54  
55  
56  
57  
58  
59  
60

## 301 **Timeline**

302           The expected timeline from the start of the study to full development of the core set of  
303 outcome domains will be 18 to 24 months. Identification of an initial list of outcomes, via  
304 systematic review followed by qualitative interviews, will span approximately seven to eight  
305 months. An additional seven to ten months will be dedicated to conducting the Delphi survey and  
306 convening the consensus meeting, followed by approximately four to six months for analyzing  
307 feedback and drafting, circulating, and finalizing the manuscript.

308

## 309 **Patient and Public Involvement**

310           The patient and public perspective will be sought at multiple points in this study. Patient  
311 stakeholders will review plain language summaries of outcome definitions. A minimum of one  
312 patient representative will be included in the research team, as described earlier in this protocol.  
313 Additionally, patients will be recognized as key stakeholders during the identification and  
314 prioritization of outcomes, with fully one-half of the Delphi process reserved for patients.  
315 Patients will be encouraged to provide feedback before (semi-structured interviews), during, and  
316 after (at the consensus meeting) the Delphi process to ensure that patient-centered outcomes are  
317 incorporated. Lastly, with their consent, patient representatives will be named as contributors in  
318 any published work that arises from the study.

319

## 320 **ETHICS AND DISSEMINATION**

### 321 **Dissemination and Implementation of Results**

1  
2  
3 322 The full development of this COS and the results of the study will be reported in peer-  
4  
5 323 reviewed journals. The main results of the study, including the core outcome set, will be  
6  
7 324 disseminated to all participants through email at the time of study publication. Researchers will  
8  
9 325 be encouraged to use the COS when performing future trials.  
10  
11  
12

13 326

### 16 327 **Ethical Approval and Consent to Participate**

17  
18  
19 328 Ethical approval and consent to participate for the study has been granted from the  
20  
21 329 Northwestern University IRB (protocol ID: STU00201637). Informed consent will be presented  
22  
23 330 before registering for the Delphi. The Northwestern University IRB has waived written informed  
24  
25 331 consent and has approved verbal consent for interviews, and online consent for the Delphi  
26  
27  
28 332 process.  
29  
30

31 333

### 34 334 **DISCUSSION**

35  
36  
37 335 Despite the numerous completed and ongoing clinical trials of treatments for melasma,  
38  
39 336 there is currently no COS informing such investigations. The proposed core outcome set for  
40  
41 337 melasma would provide a minimum set of outcomes to be reported in all trials of melasma, thus  
42  
43 338 standardizing future outcomes reporting. Investigators would be free to consider and include  
44  
45 339 additional outcomes beyond the core set, but their use of at least the core set would allow  
46  
47 340 aggregation and comparison of data across melasma trials. Cross-trial comparisons of  
48  
49 341 treatments and large-scale meta-analyses would, in turn, enable more definitive conclusions on  
50  
51 342 the merits of available treatments.  
52  
53  
54  
55  
56  
57  
58  
59  
60

1  
2  
3 343  
4  
56 344 **Trial Registration and Status**  
7

8  
9 345 This study has been registered with both the COMET and CS-COUSIN initiatives for  
10  
11 346 core outcome set development, and the development of this protocol is in accordance with the  
12  
13 347 guidelines for protocol development of both groups. The development of the core outcome set is  
14  
15 348 currently in its initial phase of outcome extraction.  
16  
17

18  
19 349  
20  
2122 350  
23  
24  
25  
26  
27  
28  
29  
30  
31  
32  
33  
34  
35  
36  
37  
38  
39  
40  
41  
42  
43  
44  
45  
46  
47  
48  
49  
50  
51  
52  
53  
54  
55  
56  
57  
58  
59  
60

1  
2  
3 352 **DECLARATIONS:**  
4

5 353  
6

7  
8 354 **Abbreviations**  
9

10 355 **COMET:** Core Outcome Measures in Effectiveness Trials  
11

12 356 **COS:** Core outcome set  
13

14 357 **CS-COUSIN:** Cochrane Skin - Core Outcome Set Initiative  
15

16  
17 358 **HOME:** Harmonising Outcome Measures for Eczema  
18

19 359 **IMPROVED:** Measurement of Priority Outcome Variables in Dermatologic Surgery Group  
20  
21

22 360  
23

24 361 **Consent for publication**  
25

26 362 All authors consent.  
27  
28

29 363  
30

31 364 I, the Submitting Author has the right to grant and does grant on behalf of all authors of the Work (as  
32  
33 365 defined in the below author licence), an exclusive licence and/or a non-exclusive licence for contributions  
34  
35 366 from authors who are: i) UK Crown employees; ii) where BMJ has agreed a CC-BY licence shall apply,  
36  
37 367 and/or iii) in accordance with the terms applicable for US Federal Government officers or employees  
38  
39 368 acting as part of their official duties; on a worldwide, perpetual, irrevocable, royalty-free basis to BMJ  
40  
41 369 Publishing Group Ltd (“BMJ”) its licensees and where the relevant Journal is co-owned by BMJ to the  
42  
43 370 co-owners of the Journal, to publish the Work in BMJ Open and any other BMJ products and to exploit  
44  
45 371 all rights, as set out in our [licence](#).  
46  
47

48 372  
49

50 373 The Submitting Author accepts and understands that any supply made under these terms is made by BMJ  
51  
52 374 to the Submitting Author unless you are acting as an employee on behalf of your employer or a  
53  
54 375 postgraduate student of an affiliated institution which is paying any applicable article publishing charge  
55  
56 376 (“APC”) for Open Access articles. Where the Submitting Author wishes to make the Work available on  
57  
58  
59  
60



1  
2  
3 377 an Open Access basis (and intends to pay the relevant APC), the terms of reuse of such Open Access shall  
4  
5 378 be governed by a Creative Commons licence – details of these licences and which [Creative](#)  
6  
7 379 [Commons](#) licence will apply to this Work are set out in our licence referred to above.  
8  
9

10 380

### 11 381 **Data availability statement**

12 382 There are no data in this work.  
13

14 383

### 15 384 **Funding**

16 385 This publication was supported by Merz Center for Quality and Outcomes Research in  
17  
18 386 Dermatologic Surgery and the IMPROVED (Measurement of Priority Outcome Variables in  
19  
20 387 Dermatologic Surgery) Group.  
21  
22

23 388

### 24 389 **Competing Interests**

25 390 None of the authors have personal or financial relationships with other people or organizations that may  
26  
27 391 influence their interpretation of data or presentation of information. Several of the authors (JFS, TVC,  
28  
29 392 IAN, JJK, KS, MA) have been involved also in the development of other core outcome sets, and several  
30  
31 393 (JJK, JS, MA) are members of the CS-COUSIN Methods group.  
32  
33

34 394

### 35 395 **Acknowledgments**

36 396 None  
37  
38

39 397

### 40 398 **Author Contributions**

41 399 *Study concept and design:* SAI, BYK, DIS, JT, JJK, JS, EP, IAM, JFS, TVC, and MA. *Drafting*  
42  
43 400 *of the manuscript:* SAI, BYK, SCG, EP, TVC, and MA. *Critical revision of the manuscript for*  
44  
45

1  
2  
3  
4  
5  
6  
7  
8  
9  
10  
11  
12  
13  
14  
15  
16  
17  
18  
19  
20  
21  
22  
23  
24  
25  
26  
27  
28  
29  
30  
31  
32  
33  
34  
35  
36  
37  
38  
39  
40  
41  
42  
43  
44  
45  
46  
47  
48  
49  
50  
51  
52  
53  
54  
55  
56  
57  
58  
59  
60

401 *important intellectual content: SAI, BYK, DIS, JJK, EP, and MA. Obtained funding: MA. Study*  
402 *supervision: MA. All authors read and approved the final manuscript.*

403

For peer review only

404 **REFERENCES**

- 405 1. Kauh YC, Zachian TF. Melasma. In: Mallia C, Uitto J, eds. *Rheumaderm. Advances in*  
406 *Experimental Medicine and Biology*. Vol 455. Springer; 1999:491-499. doi:10.1007/978-  
407 1-4615-4857-7\_72
- 408 2. Kang WH, Yoon KH, Lee ES, et al. Melasma: Histopathological characteristics in 56  
409 Korean patients. *Br J Dermatol*. 2002;146(2):228-237. doi:10.1046/j.0007-  
410 0963.2001.04556.x
- 411 3. Balkrishnan R, McMichael AJ, Camacho FT, et al. Development and validation of a  
412 health-related quality of life instrument for women with melasma. *Br J Dermatol*.  
413 2003;149(3):572-577. doi:10.1046/j.1365-2133.2003.05419.x
- 414 4. Mahmoud BH, Ruvolo E, Hexsel CL, et al. Impact of long-wavelength UVA and visible  
415 light on melanocompetent skin. *J Invest Dermatol*. 2010;130(8):2092-2097.  
416 doi:10.1038/jid.2010.95
- 417 5. Ortonne J, Arellano I, Berneburg M, et al. A global survey of the role of ultraviolet  
418 radiation and hormonal influences in the development of melasma. *J Eur Acad*  
419 *Dermatology Venereol*. 2009;23(11):1254-1262. doi:10.1111/j.1468-3083.2009.03295.x
- 420 6. Jang YH, Sim JH, Kang HY, Kim YC, Lee ES. The histopathological characteristics of  
421 male melasma: Comparison with female melasma and lentigo. *J Am Acad Dermatol*.  
422 2012;66(4):642-649. doi:10.1016/j.jaad.2010.10.037
- 423 7. Hernández-Barrera R, Torres-Alvarez B, Castanedo-Cazares JP, Oros-Ovalle C, Moncada  
424 B. Solar elastosis and presence of mast cells as key features in the pathogenesis of

- 1  
2  
3 425 melasma. *Clin Exp Dermatol*. 2008;33(3):305-308. doi:10.1111/j.1365-  
4  
5 426 2230.2008.02724.x  
6  
7  
8 427 8. Rajaratnam R, Halpern J, Salim A, Emmett C. Interventions for melasma. *Cochrane*  
9  
10 428 *Database Syst Rev*. 2010;(7):CD003583. doi:10.1002/14651858.cd003583.pub2  
11  
12  
13 429 9. Kirkham JJ, Dwan KM, Altman DG, et al. The impact of outcome reporting bias in  
14  
15 randomised controlled trials on a cohort of systematic reviews. *BMJ*. 2010;340:c365.  
16 430  
17 doi:10.1136/bmj.c365  
18 431  
19  
20  
21 432 10. COMET Initiative. Accessed October 2, 2020. <https://www.comet-initiative.org/>  
22  
23  
24 433 11. Cochrane Skin – Core Outcome Set Initiative. Accessed October 2, 2020. <http://cs->  
25  
26 434 [cousin.org/](http://cousin.org/)  
27  
28  
29 435 12. Schmitt J, Spuls P, Boers M, et al. Towards global consensus on outcome measures for  
30  
31 atopic eczema research: Results of the HOME II meeting. *Allergy*. 2012;67(9):1111-1117.  
32 436  
33 doi:10.1111/j.1398-9995.2012.02874.x  
34 437  
35  
36  
37 438 13. Schmitt J, Williams H, HOME Development Group. Harmonising Outcome Measures for  
38  
39 439 Eczema (HOME). Report from the first international consensus meeting (HOME 1), 24  
40  
41 440 July 2010, Munich, Germany. *Br J Dermatol*. 2010;163(6):1166-1168.  
42  
43 doi:10.1111/j.1365-2133.2010.10054.x  
44 441  
45  
46  
47 442 14. Schmitt J, Spuls PI, Thomas KS, et al. The Harmonising Outcome Measures for Eczema  
48  
49 443 (HOME) statement to assess clinical signs of atopic eczema in trials. *J Allergy Clin*  
50  
51 444 *Immunol*. 2014;134(4):800-807. doi:10.1016/j.jaci.2014.07.043  
52  
53  
54 445 15. Chalmers JR, Schmitt J, Apfelbacher C, et al. Report from the third international  
55  
56  
57  
58  
59  
60

- 1  
2  
3 446 consensus meeting to harmonise core outcome measures for atopic eczema/dermatitis  
4  
5 447 clinical trials (HOME). *Br J Dermatol*. 2014;171(6):1318-1325. doi:10.1111/bjd.13237  
6  
7  
8 448 16. Schmitt J, Apfelbacher C, Spuls PI, et al. The Harmonizing Outcome Measures for  
9  
10 449 Eczema (HOME) Roadmap: A Methodological Framework to Develop Core Sets of  
11  
12 450 Outcome Measurements in Dermatology. *J Invest Dermatol*. 2015;135(1):24-30.  
13  
14 451 doi:10.1038/jid.2014.320  
15  
16  
17  
18 452 17. Williamson PR, Altman DG, Bagley H, et al. The COMET Handbook: Version 1.0.  
19  
20 453 doi:10.1186/s13063-017-1978-4  
21  
22  
23 454 18. CS-COUSIN Methods Group. Guidance on how to develop a core outcome set for skin  
24  
25 455 disease by the CS-COUSIN methods group, Version 2.2. Published online September 5,  
26  
27 456 2018.  
28  
29  
30  
31 457 19. COMET Initiative | Core Outcome Set for Melasma. Accessed October 29, 2020.  
32  
33 458 <https://www.comet-initiative.org/studies/details/752>  
34  
35  
36 459 20. Core Outcome Set for Melasma. Accessed October 29, 2020. [http://cs-](http://cs-cousin.org/melasma/)  
37  
38 460 [cousin.org/melasma/](http://cs-cousin.org/melasma/)  
39  
40  
41 461 21. Kirkham JJ, Gorst S, Altman DG, et al. Core Outcome Set-STANDARDISED Protocol Items:  
42  
43 462 The COS-STAP Statement. *Trials*. 2019;20(1):116. doi:10.1186/s13063-019-3230-x  
44  
45  
46  
47 463 22. Iyengar S, Williamson PR, Schmitt J, et al. Development of a core outcome set for clinical  
48  
49 464 trials in rosacea: Study protocol for a systematic review of the literature and identification  
50  
51 465 of a core outcome set using a Delphi survey. *Trials*. 2016;17(1):429. doi:10.1186/s13063-  
52  
53 466 016-1554-3  
54  
55  
56  
57  
58  
59  
60

- 1  
2  
3 467 23. Reynolds KA, Schlessinger DI, Vasic J, et al. Core Outcome Set for Actinic Keratosis  
4  
5 468 Clinical Trials. *JAMA Dermatology*. 2020;156(3):326-333.  
6  
7  
8 469 doi:10.1001/jamadermatol.2019.4212  
9  
10  
11 470 24. Reynolds KA, Schlessinger DI, Yanes AF, et al. Development of a core outcome set for  
12  
13 471 cutaneous squamous cell carcinoma trials: identification of core domains and outcomes  
14  
15 472 [published online ahead of print, 2020 Nov 25]. *Br J Dermatol*. Published online 2020.  
16  
17 473 doi:10.1111/bjd.19693  
18  
19  
20  
21 474 25. Ingram JR, Hadjieconomou S, Piguet V. Development of core outcome sets in hidradenitis  
22  
23 475 suppurativa: systematic review of outcome measure instruments to inform the process. *Br*  
24  
25 476 *J Dermatol*. 2016;175(2):263-272. doi:10.1111/bjd.14475  
26  
27  
28 477 26. Thorlacius L, Ingram JR, Garg A, et al. Protocol for the development of a core domain set  
29  
30 478 for hidradenitis suppurativa trial outcomes. *BMJ Open*. 2017;7(2):14733.  
31  
32 479 doi:10.1136/bmjopen-2016-014733  
33  
34  
35  
36 480 27. Guideline for Selecting Instruments for a Core Outcome Set • COSMIN. Accessed  
37  
38 481 October 2, 2020. <https://www.cosmin.nl/tools/guideline-selecting-proms-cos/>  
39  
40  
41 482 28. Young AE, Brookes ST, Avery KNL, Davies A, Metcalfe C, Blazeby JM. A systematic  
42  
43 483 review of core outcome set development studies demonstrates difficulties in defining  
44  
45 484 unique outcomes. *J Clin Epidemiol*. 2019;115:14-24. doi:10.1016/j.jclinepi.2019.06.016  
46  
47  
48  
49 485 29. COMET Initiative | Outcome Classification. Accessed October 2, 2020.  
50  
51 486 <https://www.comet-initiative.org/Resources/OutcomeClassification>  
52  
53  
54 487 30. Lange T, Kottner J, Weberschock T, et al. Outcome assessment in dermatology clinical  
55  
56  
57  
58  
59  
60

- 1  
2  
3 488 trials and cochrane reviews: call for a dermatology-specific outcome taxonomy. *J Eur*  
4  
5 489 *Acad Dermatology Venereol.* 2021;35(2):523-535. doi:10.1111/jdv.16854  
6  
7  
8 490 31. Smith H, Horobin A, Fackrell K, Colley V, Thacker B, Hall DA. Defining and evaluating  
9  
10 491 novel procedures for involving patients in core outcome set research: Creating a  
11  
12 492 meaningful long list of candidate outcome domains. *Res Involv Engagem.* 2018;4(1):1-12.  
13  
14 493 doi:10.1186/s40900-018-0091-5  
15  
16  
17 494 32. Guyatt GH, Oxman AD, Kunz R, et al. GRADE guidelines: 2. Framing the question and  
18  
19 495 deciding on important outcomes. *J Clin Epidemiol.* 2011;64(4):395-400.  
20  
21 496 doi:10.1016/j.jclinepi.2010.09.012  
22  
23  
24 497 33. Harman NL, Bruce IA, Kirkham JJ, et al. The importance of integration of stakeholder  
25  
26 498 views in core outcome set development: Otitis Media with Effusion in children with cleft  
27  
28 499 palate. *PLoS One.* 2015;10(6):e0129514. doi:10.1371/journal.pone.0129514  
29  
30  
31  
32 500 34. Williamson PR, Altman DG, Blazeby JM, et al. Developing core outcome sets for clinical  
33  
34 501 trials: Issues to consider. *Trials.* 2012;13:132. doi:10.1186/1745-6215-13-132  
35  
36  
37 502 35. Potter S, Holcombe C, Ward JA, Blazeby JM. Development of a core outcome set for  
38  
39 503 research and audit studies in reconstructive breast surgery. *Br J Surg.* 2015;102(11):1360-  
40  
41 504 1371. doi:10.1002/bjs.9883  
42  
43  
44  
45 505 36. Blazeby JM, Macefield R, Blencowe NS, et al. Core information set for oesophageal  
46  
47 506 cancer surgery. *Br J Surg.* 2015;102(8):936-943. doi:10.1002/bjs.9840  
48  
49  
50  
51 507

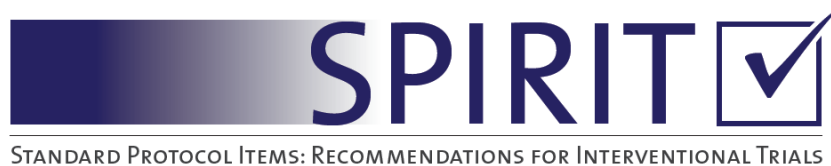

STANDARD PROTOCOL ITEMS: RECOMMENDATIONS FOR INTERVENTIONAL TRIALS

SPIRIT 2013 Checklist: Recommended items to address in a clinical trial protocol and related documents\*

| Section/item                      | ItemNo | Description                                                                                                                                                                                                                                                                              | Page Number |
|-----------------------------------|--------|------------------------------------------------------------------------------------------------------------------------------------------------------------------------------------------------------------------------------------------------------------------------------------------|-------------|
| <b>Administrative information</b> |        |                                                                                                                                                                                                                                                                                          |             |
| Title                             | 1      | Descriptive title identifying the study design, population, interventions, and, if applicable, trial acronym                                                                                                                                                                             | Page 1      |
| Trial registration                | 2a     | Trial identifier and registry name. If not yet registered, name of intended registry                                                                                                                                                                                                     | Page 16     |
|                                   | 2b     | All items from the World Health Organization Trial Registration Data Set                                                                                                                                                                                                                 | N/A         |
| Protocol version                  | 3      | Date and version identifier                                                                                                                                                                                                                                                              | N/A         |
| Funding                           | 4      | Sources and types of financial, material, and other support                                                                                                                                                                                                                              | Page 17     |
| Roles and responsibilities        | 5a     | Names, affiliations, and roles of protocol contributors                                                                                                                                                                                                                                  | Page 1      |
|                                   | 5b     | Name and contact information for the trial sponsor                                                                                                                                                                                                                                       | N/A         |
|                                   | 5c     | Role of study sponsor and funders, if any, in study design; collection, management, analysis, and interpretation of data; writing of the report; and the decision to submit the report for publication, including whether they will have ultimate authority over any of these activities | N/A         |



|    |                                                           |     |                                          |        |
|----|-----------------------------------------------------------|-----|------------------------------------------|--------|
| 1  |                                                           |     |                                          |        |
| 2  |                                                           | 5d  | Composition, roles, and                  | Page 8 |
| 3  |                                                           |     | responsibilities of the coordinating     |        |
| 4  |                                                           |     | centre, steering committee,              |        |
| 5  |                                                           |     | endpoint adjudication committee,         |        |
| 6  |                                                           |     | data management team, and other          |        |
| 7  |                                                           |     | individuals or groups overseeing         |        |
| 8  |                                                           |     | the trial, if applicable (see Item 21a   |        |
| 9  |                                                           |     | for data monitoring committee)           |        |
| 10 |                                                           |     |                                          |        |
| 11 |                                                           |     |                                          |        |
| 12 |                                                           |     |                                          |        |
| 13 | <b>Introduction</b>                                       |     |                                          |        |
| 14 |                                                           |     |                                          |        |
| 15 | Background and                                            | 6a  | Description of research question         | Page 6 |
| 16 | rationale                                                 |     | and justification for undertaking        |        |
| 17 |                                                           |     | the trial, including summary of          |        |
| 18 |                                                           |     | relevant studies (published and          |        |
| 19 |                                                           |     | unpublished) examining benefits          |        |
| 20 |                                                           |     | and harms for each intervention          |        |
| 21 |                                                           |     |                                          |        |
| 22 |                                                           |     |                                          |        |
| 23 |                                                           | 6b  | Explanation for choice of                | N/A    |
| 24 |                                                           |     | comparators                              |        |
| 25 |                                                           |     |                                          |        |
| 26 | Objectives                                                | 7   | Specific objectives or hypotheses        | N/A    |
| 27 |                                                           |     |                                          |        |
| 28 | Trial design                                              | 8   | Description of trial design including    | N/A    |
| 29 |                                                           |     | type of trial (eg, parallel group,       |        |
| 30 |                                                           |     | crossover, factorial, single group),     |        |
| 31 |                                                           |     | allocation ratio, and framework          |        |
| 32 |                                                           |     | (eg, superiority, equivalence,           |        |
| 33 |                                                           |     | noninferiority, exploratory)             |        |
| 34 |                                                           |     |                                          |        |
| 35 |                                                           |     |                                          |        |
| 36 |                                                           |     |                                          |        |
| 37 | <b>Methods: Participants, interventions, and outcomes</b> |     |                                          |        |
| 38 |                                                           |     |                                          |        |
| 39 | Study setting                                             | 9   | Description of study settings (eg,       | N/A    |
| 40 |                                                           |     | community clinic, academic               |        |
| 41 |                                                           |     | hospital) and list of countries          |        |
| 42 |                                                           |     | where data will be collected.            |        |
| 43 |                                                           |     | Reference to where list of study         |        |
| 44 |                                                           |     | sites can be obtained                    |        |
| 45 |                                                           |     |                                          |        |
| 46 |                                                           |     |                                          |        |
| 47 | Eligibility criteria                                      | 10  | Inclusion and exclusion criteria for     | N/A    |
| 48 |                                                           |     | participants. If applicable, eligibility |        |
| 49 |                                                           |     | criteria for study centres and           |        |
| 50 |                                                           |     | individuals who will perform the         |        |
| 51 |                                                           |     | interventions (eg, surgeons,             |        |
| 52 |                                                           |     | psychotherapists)                        |        |
| 53 |                                                           |     |                                          |        |
| 54 |                                                           |     |                                          |        |
| 55 | Interventions                                             | 11a | Interventions for each group with        | N/A    |
| 56 |                                                           |     | sufficient detail to allow replication,  |        |
| 57 |                                                           |     | including how and when they will         |        |
| 58 |                                                           |     | be administered                          |        |
| 59 |                                                           |     |                                          |        |
| 60 |                                                           |     |                                          |        |

|    |             |     |                                      |     |
|----|-------------|-----|--------------------------------------|-----|
| 1  |             |     |                                      |     |
| 2  |             | 11b | Criteria for discontinuing or        | N/A |
| 3  |             |     | modifying allocated interventions    |     |
| 4  |             |     | for a given trial participant (eg,   |     |
| 5  |             |     | drug dose change in response to      |     |
| 6  |             |     | harms, participant request, or       |     |
| 7  |             |     | improving/worsening disease)         |     |
| 8  |             |     |                                      |     |
| 9  |             |     |                                      |     |
| 10 |             | 11c | Strategies to improve adherence      | N/A |
| 11 |             |     | to intervention protocols, and any   |     |
| 12 |             |     | procedures for monitoring            |     |
| 13 |             |     | adherence (eg, drug tablet return,   |     |
| 14 |             |     | laboratory tests)                    |     |
| 15 |             |     |                                      |     |
| 16 |             |     |                                      |     |
| 17 |             | 11d | Relevant concomitant care and        | N/A |
| 18 |             |     | interventions that are permitted or  |     |
| 19 |             |     | prohibited during the trial          |     |
| 20 |             |     |                                      |     |
| 21 | Outcomes    | 12  | Primary, secondary, and other        | N/A |
| 22 |             |     | outcomes, including the specific     |     |
| 23 |             |     | measurement variable (eg, systolic   |     |
| 24 |             |     | blood pressure), analysis metric     |     |
| 25 |             |     | (eg, change from baseline, final     |     |
| 26 |             |     | value, time to event), method of     |     |
| 27 |             |     | aggregation (eg, median,             |     |
| 28 |             |     | proportion), and time point for      |     |
| 29 |             |     | each outcome. Explanation of the     |     |
| 30 |             |     | clinical relevance of chosen         |     |
| 31 |             |     | efficacy and harm outcomes is        |     |
| 32 |             |     | strongly recommended                 |     |
| 33 |             |     |                                      |     |
| 34 |             |     |                                      |     |
| 35 |             |     |                                      |     |
| 36 |             |     |                                      |     |
| 37 | Participant | 13  | Time schedule of enrolment,          | N/A |
| 38 | timeline    |     | interventions (including any run-ins |     |
| 39 |             |     | and washouts), assessments, and      |     |
| 40 |             |     | visits for participants. A schematic |     |
| 41 |             |     | diagram is highly recommended        |     |
| 42 |             |     | (see Figure)                         |     |
| 43 |             |     |                                      |     |
| 44 |             |     |                                      |     |
| 45 | Sample size | 14  | Estimated number of participants     | N/A |
| 46 |             |     | needed to achieve study              |     |
| 47 |             |     | objectives and how it was            |     |
| 48 |             |     | determined, including clinical and   |     |
| 49 |             |     | statistical assumptions supporting   |     |
| 50 |             |     | any sample size calculations         |     |
| 51 |             |     |                                      |     |
| 52 |             |     |                                      |     |
| 53 | Recruitment | 15  | Strategies for achieving adequate    | N/A |
| 54 |             |     | participant enrolment to reach       |     |
| 55 |             |     | target sample size                   |     |
| 56 |             |     |                                      |     |
| 57 |             |     |                                      |     |

**Methods: Assignment of interventions (for controlled trials)**

## Allocation:

|                                  |     |                                                                                                                                                                                                                                                                                                                                                          |     |
|----------------------------------|-----|----------------------------------------------------------------------------------------------------------------------------------------------------------------------------------------------------------------------------------------------------------------------------------------------------------------------------------------------------------|-----|
| Sequence generation              | 16a | Method of generating the allocation sequence (eg, computer-generated random numbers), and list of any factors for stratification. To reduce predictability of a random sequence, details of any planned restriction (eg, blocking) should be provided in a separate document that is unavailable to those who enrol participants or assign interventions | N/A |
| Allocation concealment mechanism | 16b | Mechanism of implementing the allocation sequence (eg, central telephone; sequentially numbered, opaque, sealed envelopes), describing any steps to conceal the sequence until interventions are assigned                                                                                                                                                | N/A |
| Implementation                   | 16c | Who will generate the allocation sequence, who will enrol participants, and who will assign participants to interventions                                                                                                                                                                                                                                | N/A |
| Blinding (masking)               | 17a | Who will be blinded after assignment to interventions (eg, trial participants, care providers, outcome assessors, data analysts), and how                                                                                                                                                                                                                | N/A |
|                                  | 17b | If blinded, circumstances under which unblinding is permissible, and procedure for revealing a participant's allocated intervention during the trial                                                                                                                                                                                                     | N/A |

**Methods: Data collection, management, and analysis**

|    |                            |     |                                                                                                                                                                                                                                                                                                                                                                                                              |                                                                                                                                                                                           |
|----|----------------------------|-----|--------------------------------------------------------------------------------------------------------------------------------------------------------------------------------------------------------------------------------------------------------------------------------------------------------------------------------------------------------------------------------------------------------------|-------------------------------------------------------------------------------------------------------------------------------------------------------------------------------------------|
| 1  |                            |     |                                                                                                                                                                                                                                                                                                                                                                                                              |                                                                                                                                                                                           |
| 2  | Data collection methods    | 18a | Plans for assessment and collection of outcome, baseline, and other trial data, including any related processes to promote data quality (eg, duplicate measurements, training of assessors) and a description of study instruments (eg, questionnaires, laboratory tests) along with their reliability and validity, if known. Reference to where data collection forms can be found, if not in the protocol | Page 9                                                                                                                                                                                    |
| 3  |                            |     |                                                                                                                                                                                                                                                                                                                                                                                                              |                                                                                                                                                                                           |
| 4  |                            |     |                                                                                                                                                                                                                                                                                                                                                                                                              |                                                                                                                                                                                           |
| 5  |                            |     |                                                                                                                                                                                                                                                                                                                                                                                                              |                                                                                                                                                                                           |
| 6  |                            |     |                                                                                                                                                                                                                                                                                                                                                                                                              |                                                                                                                                                                                           |
| 7  |                            |     |                                                                                                                                                                                                                                                                                                                                                                                                              |                                                                                                                                                                                           |
| 8  |                            |     |                                                                                                                                                                                                                                                                                                                                                                                                              |                                                                                                                                                                                           |
| 9  |                            |     |                                                                                                                                                                                                                                                                                                                                                                                                              |                                                                                                                                                                                           |
| 10 |                            |     |                                                                                                                                                                                                                                                                                                                                                                                                              |                                                                                                                                                                                           |
| 11 |                            |     |                                                                                                                                                                                                                                                                                                                                                                                                              |                                                                                                                                                                                           |
| 12 |                            |     |                                                                                                                                                                                                                                                                                                                                                                                                              |                                                                                                                                                                                           |
| 13 |                            |     |                                                                                                                                                                                                                                                                                                                                                                                                              |                                                                                                                                                                                           |
| 14 |                            |     |                                                                                                                                                                                                                                                                                                                                                                                                              |                                                                                                                                                                                           |
| 15 |                            |     |                                                                                                                                                                                                                                                                                                                                                                                                              |                                                                                                                                                                                           |
| 16 |                            |     |                                                                                                                                                                                                                                                                                                                                                                                                              |                                                                                                                                                                                           |
| 17 |                            |     |                                                                                                                                                                                                                                                                                                                                                                                                              |                                                                                                                                                                                           |
| 18 |                            |     | 18b                                                                                                                                                                                                                                                                                                                                                                                                          | Plans to promote participant retention and complete follow-up, including list of any outcome data to be collected for participants who discontinue or deviate from intervention protocols |
| 19 |                            |     |                                                                                                                                                                                                                                                                                                                                                                                                              |                                                                                                                                                                                           |
| 20 |                            |     |                                                                                                                                                                                                                                                                                                                                                                                                              |                                                                                                                                                                                           |
| 21 |                            |     |                                                                                                                                                                                                                                                                                                                                                                                                              |                                                                                                                                                                                           |
| 22 |                            |     |                                                                                                                                                                                                                                                                                                                                                                                                              |                                                                                                                                                                                           |
| 23 |                            |     |                                                                                                                                                                                                                                                                                                                                                                                                              |                                                                                                                                                                                           |
| 24 |                            |     |                                                                                                                                                                                                                                                                                                                                                                                                              |                                                                                                                                                                                           |
| 25 |                            |     |                                                                                                                                                                                                                                                                                                                                                                                                              |                                                                                                                                                                                           |
| 26 | Data management            | 19  | Plans for data entry, coding, security, and storage, including any related processes to promote data quality (eg, double data entry; range checks for data values). Reference to where details of data management procedures can be found, if not in the protocol                                                                                                                                            | Page 9                                                                                                                                                                                    |
| 27 |                            |     |                                                                                                                                                                                                                                                                                                                                                                                                              |                                                                                                                                                                                           |
| 28 |                            |     |                                                                                                                                                                                                                                                                                                                                                                                                              |                                                                                                                                                                                           |
| 29 |                            |     |                                                                                                                                                                                                                                                                                                                                                                                                              |                                                                                                                                                                                           |
| 30 |                            |     |                                                                                                                                                                                                                                                                                                                                                                                                              |                                                                                                                                                                                           |
| 31 |                            |     |                                                                                                                                                                                                                                                                                                                                                                                                              |                                                                                                                                                                                           |
| 32 |                            |     |                                                                                                                                                                                                                                                                                                                                                                                                              |                                                                                                                                                                                           |
| 33 |                            |     |                                                                                                                                                                                                                                                                                                                                                                                                              |                                                                                                                                                                                           |
| 34 |                            |     |                                                                                                                                                                                                                                                                                                                                                                                                              |                                                                                                                                                                                           |
| 35 |                            |     |                                                                                                                                                                                                                                                                                                                                                                                                              |                                                                                                                                                                                           |
| 36 |                            |     |                                                                                                                                                                                                                                                                                                                                                                                                              |                                                                                                                                                                                           |
| 37 | Statistical methods        | 20a | Statistical methods for analysing primary and secondary outcomes. Reference to where other details of the statistical analysis plan can be found, if not in the protocol                                                                                                                                                                                                                                     | N/A                                                                                                                                                                                       |
| 38 |                            |     |                                                                                                                                                                                                                                                                                                                                                                                                              |                                                                                                                                                                                           |
| 39 |                            |     |                                                                                                                                                                                                                                                                                                                                                                                                              |                                                                                                                                                                                           |
| 40 |                            |     |                                                                                                                                                                                                                                                                                                                                                                                                              |                                                                                                                                                                                           |
| 41 |                            |     |                                                                                                                                                                                                                                                                                                                                                                                                              |                                                                                                                                                                                           |
| 42 |                            |     |                                                                                                                                                                                                                                                                                                                                                                                                              |                                                                                                                                                                                           |
| 43 |                            | 20b | Methods for any additional analyses (eg, subgroup and adjusted analyses)                                                                                                                                                                                                                                                                                                                                     | N/A                                                                                                                                                                                       |
| 44 |                            |     |                                                                                                                                                                                                                                                                                                                                                                                                              |                                                                                                                                                                                           |
| 45 |                            |     |                                                                                                                                                                                                                                                                                                                                                                                                              |                                                                                                                                                                                           |
| 46 |                            |     |                                                                                                                                                                                                                                                                                                                                                                                                              |                                                                                                                                                                                           |
| 47 |                            |     |                                                                                                                                                                                                                                                                                                                                                                                                              |                                                                                                                                                                                           |
| 48 |                            | 20c | Definition of analysis population relating to protocol non-adherence (eg, as randomised analysis), and any statistical methods to handle missing data (eg, multiple imputation)                                                                                                                                                                                                                              | N/A                                                                                                                                                                                       |
| 49 |                            |     |                                                                                                                                                                                                                                                                                                                                                                                                              |                                                                                                                                                                                           |
| 50 |                            |     |                                                                                                                                                                                                                                                                                                                                                                                                              |                                                                                                                                                                                           |
| 51 |                            |     |                                                                                                                                                                                                                                                                                                                                                                                                              |                                                                                                                                                                                           |
| 52 |                            |     |                                                                                                                                                                                                                                                                                                                                                                                                              |                                                                                                                                                                                           |
| 53 |                            |     |                                                                                                                                                                                                                                                                                                                                                                                                              |                                                                                                                                                                                           |
| 54 |                            |     |                                                                                                                                                                                                                                                                                                                                                                                                              |                                                                                                                                                                                           |
| 55 |                            |     |                                                                                                                                                                                                                                                                                                                                                                                                              |                                                                                                                                                                                           |
| 56 |                            |     |                                                                                                                                                                                                                                                                                                                                                                                                              |                                                                                                                                                                                           |
| 57 | <b>Methods: Monitoring</b> |     |                                                                                                                                                                                                                                                                                                                                                                                                              |                                                                                                                                                                                           |
| 58 |                            |     |                                                                                                                                                                                                                                                                                                                                                                                                              |                                                                                                                                                                                           |
| 59 |                            |     |                                                                                                                                                                                                                                                                                                                                                                                                              |                                                                                                                                                                                           |
| 60 |                            |     |                                                                                                                                                                                                                                                                                                                                                                                                              |                                                                                                                                                                                           |

|    |                                 |     |                                                                                                                                                                                                                                  |         |
|----|---------------------------------|-----|----------------------------------------------------------------------------------------------------------------------------------------------------------------------------------------------------------------------------------|---------|
| 1  |                                 |     |                                                                                                                                                                                                                                  |         |
| 2  | Data monitoring                 | 21a | Composition of data monitoring committee (DMC); summary of its role and reporting structure;                                                                                                                                     | N/A     |
| 3  |                                 |     | statement of whether it is                                                                                                                                                                                                       |         |
| 4  |                                 |     | independent from the sponsor and                                                                                                                                                                                                 |         |
| 5  |                                 |     | competing interests; and reference                                                                                                                                                                                               |         |
| 6  |                                 |     | to where further details about its                                                                                                                                                                                               |         |
| 7  |                                 |     | charter can be found, if not in the                                                                                                                                                                                              |         |
| 8  |                                 |     | protocol. Alternatively, an                                                                                                                                                                                                      |         |
| 9  |                                 |     | explanation of why a DMC is not                                                                                                                                                                                                  |         |
| 10 |                                 |     | needed                                                                                                                                                                                                                           |         |
| 11 |                                 |     |                                                                                                                                                                                                                                  |         |
| 12 |                                 | 21b | Description of any interim analyses                                                                                                                                                                                              | N/A     |
| 13 |                                 |     | and stopping guidelines, including                                                                                                                                                                                               |         |
| 14 |                                 |     | who will have access to these                                                                                                                                                                                                    |         |
| 15 |                                 |     | interim results and make the final                                                                                                                                                                                               |         |
| 16 |                                 |     | decision to terminate the trial                                                                                                                                                                                                  |         |
| 17 |                                 |     |                                                                                                                                                                                                                                  |         |
| 18 | Harms                           | 22  | Plans for collecting, assessing,                                                                                                                                                                                                 | N/A     |
| 19 |                                 |     | reporting, and managing solicited                                                                                                                                                                                                |         |
| 20 |                                 |     | and spontaneously reported                                                                                                                                                                                                       |         |
| 21 |                                 |     | adverse events and other                                                                                                                                                                                                         |         |
| 22 |                                 |     | unintended effects of trial                                                                                                                                                                                                      |         |
| 23 |                                 |     | interventions or trial conduct                                                                                                                                                                                                   |         |
| 24 |                                 |     |                                                                                                                                                                                                                                  |         |
| 25 | Auditing                        | 23  | Frequency and procedures for                                                                                                                                                                                                     | N/A     |
| 26 |                                 |     | auditing trial conduct, if any, and                                                                                                                                                                                              |         |
| 27 |                                 |     | whether the process will be                                                                                                                                                                                                      |         |
| 28 |                                 |     | independent from investigators                                                                                                                                                                                                   |         |
| 29 |                                 |     | and the sponsor                                                                                                                                                                                                                  |         |
| 30 |                                 |     |                                                                                                                                                                                                                                  |         |
| 31 |                                 |     |                                                                                                                                                                                                                                  |         |
| 32 |                                 |     |                                                                                                                                                                                                                                  |         |
| 33 |                                 |     |                                                                                                                                                                                                                                  |         |
| 34 |                                 |     |                                                                                                                                                                                                                                  |         |
| 35 |                                 |     |                                                                                                                                                                                                                                  |         |
| 36 |                                 |     |                                                                                                                                                                                                                                  |         |
| 37 |                                 |     |                                                                                                                                                                                                                                  |         |
| 38 |                                 |     |                                                                                                                                                                                                                                  |         |
| 39 | <b>Ethics and dissemination</b> |     |                                                                                                                                                                                                                                  |         |
| 40 | Research ethics approval        | 24  | Plans for seeking research ethics committee/institutional review board (REC/IRB) approval                                                                                                                                        | Page 15 |
| 41 |                                 |     |                                                                                                                                                                                                                                  |         |
| 42 |                                 |     |                                                                                                                                                                                                                                  |         |
| 43 |                                 |     |                                                                                                                                                                                                                                  |         |
| 44 |                                 |     |                                                                                                                                                                                                                                  |         |
| 45 | Protocol amendments             | 25  | Plans for communicating important protocol modifications (eg, changes to eligibility criteria, outcomes, analyses) to relevant parties (eg, investigators, REC/IRBs, trial participants, trial registries, journals, regulators) | Page 15 |
| 46 |                                 |     |                                                                                                                                                                                                                                  |         |
| 47 |                                 |     |                                                                                                                                                                                                                                  |         |
| 48 |                                 |     |                                                                                                                                                                                                                                  |         |
| 49 |                                 |     |                                                                                                                                                                                                                                  |         |
| 50 |                                 |     |                                                                                                                                                                                                                                  |         |
| 51 |                                 |     |                                                                                                                                                                                                                                  |         |
| 52 |                                 |     |                                                                                                                                                                                                                                  |         |
| 53 |                                 |     |                                                                                                                                                                                                                                  |         |
| 54 | Consent or assent               | 26a | Who will obtain informed consent or assent from potential trial participants or authorised surrogates, and how (see Item 32)                                                                                                     | Page 15 |
| 55 |                                 |     |                                                                                                                                                                                                                                  |         |
| 56 |                                 |     |                                                                                                                                                                                                                                  |         |
| 57 |                                 |     |                                                                                                                                                                                                                                  |         |
| 58 |                                 |     |                                                                                                                                                                                                                                  |         |
| 59 |                                 |     |                                                                                                                                                                                                                                  |         |
| 60 |                                 |     |                                                                                                                                                                                                                                  |         |

|    |                               |     |                                                                                                                                                                                                                                                                                     |         |
|----|-------------------------------|-----|-------------------------------------------------------------------------------------------------------------------------------------------------------------------------------------------------------------------------------------------------------------------------------------|---------|
| 1  |                               |     |                                                                                                                                                                                                                                                                                     |         |
| 2  |                               | 26b | Additional consent provisions for collection and use of participant data and biological specimens in ancillary studies, if applicable                                                                                                                                               |         |
| 3  |                               |     |                                                                                                                                                                                                                                                                                     |         |
| 4  |                               |     |                                                                                                                                                                                                                                                                                     |         |
| 5  |                               |     |                                                                                                                                                                                                                                                                                     |         |
| 6  |                               |     |                                                                                                                                                                                                                                                                                     |         |
| 7  | Confidentiality               | 27  | How personal information about potential and enrolled participants will be collected, shared, and maintained in order to protect confidentiality before, during, and after the trial                                                                                                | N/A     |
| 8  |                               |     |                                                                                                                                                                                                                                                                                     |         |
| 9  |                               |     |                                                                                                                                                                                                                                                                                     |         |
| 10 |                               |     |                                                                                                                                                                                                                                                                                     |         |
| 11 |                               |     |                                                                                                                                                                                                                                                                                     |         |
| 12 |                               |     |                                                                                                                                                                                                                                                                                     |         |
| 13 |                               |     |                                                                                                                                                                                                                                                                                     |         |
| 14 |                               |     |                                                                                                                                                                                                                                                                                     |         |
| 15 | Declaration of interests      | 28  | Financial and other competing interests for principal investigators for the overall trial and each study site                                                                                                                                                                       | Page 17 |
| 16 |                               |     |                                                                                                                                                                                                                                                                                     |         |
| 17 |                               |     |                                                                                                                                                                                                                                                                                     |         |
| 18 |                               |     |                                                                                                                                                                                                                                                                                     |         |
| 19 |                               |     |                                                                                                                                                                                                                                                                                     |         |
| 20 |                               |     |                                                                                                                                                                                                                                                                                     |         |
| 21 | Access to data                | 29  | Statement of who will have access to the final trial dataset, and disclosure of contractual agreements that limit such access for investigators                                                                                                                                     | N/A     |
| 22 |                               |     |                                                                                                                                                                                                                                                                                     |         |
| 23 |                               |     |                                                                                                                                                                                                                                                                                     |         |
| 24 |                               |     |                                                                                                                                                                                                                                                                                     |         |
| 25 |                               |     |                                                                                                                                                                                                                                                                                     |         |
| 26 |                               |     |                                                                                                                                                                                                                                                                                     |         |
| 27 |                               |     |                                                                                                                                                                                                                                                                                     |         |
| 28 | Ancillary and post-trial care | 30  | Provisions, if any, for ancillary and post-trial care, and for compensation to those who suffer harm from trial participation                                                                                                                                                       | N/A     |
| 29 |                               |     |                                                                                                                                                                                                                                                                                     |         |
| 30 |                               |     |                                                                                                                                                                                                                                                                                     |         |
| 31 |                               |     |                                                                                                                                                                                                                                                                                     |         |
| 32 |                               |     |                                                                                                                                                                                                                                                                                     |         |
| 33 |                               |     |                                                                                                                                                                                                                                                                                     |         |
| 34 | Dissemination policy          | 31a | Plans for investigators and sponsor to communicate trial results to participants, healthcare professionals, the public, and other relevant groups (eg, via publication, reporting in results databases, or other data sharing arrangements), including any publication restrictions | Page 15 |
| 35 |                               |     |                                                                                                                                                                                                                                                                                     |         |
| 36 |                               |     |                                                                                                                                                                                                                                                                                     |         |
| 37 |                               |     |                                                                                                                                                                                                                                                                                     |         |
| 38 |                               |     |                                                                                                                                                                                                                                                                                     |         |
| 39 |                               |     |                                                                                                                                                                                                                                                                                     |         |
| 40 |                               |     |                                                                                                                                                                                                                                                                                     |         |
| 41 |                               |     |                                                                                                                                                                                                                                                                                     |         |
| 42 |                               |     |                                                                                                                                                                                                                                                                                     |         |
| 43 |                               |     |                                                                                                                                                                                                                                                                                     |         |
| 44 |                               |     |                                                                                                                                                                                                                                                                                     |         |
| 45 |                               |     |                                                                                                                                                                                                                                                                                     |         |
| 46 |                               | 31b | Authorship eligibility guidelines and any intended use of professional writers                                                                                                                                                                                                      | Page 18 |
| 47 |                               |     |                                                                                                                                                                                                                                                                                     |         |
| 48 |                               |     |                                                                                                                                                                                                                                                                                     |         |
| 49 |                               |     |                                                                                                                                                                                                                                                                                     |         |
| 50 |                               |     |                                                                                                                                                                                                                                                                                     |         |
| 51 |                               | 31c | Plans, if any, for granting public access to the full protocol, participant-level dataset, and statistical code                                                                                                                                                                     | Page 15 |
| 52 |                               |     |                                                                                                                                                                                                                                                                                     |         |
| 53 |                               |     |                                                                                                                                                                                                                                                                                     |         |
| 54 |                               |     |                                                                                                                                                                                                                                                                                     |         |
| 55 |                               |     |                                                                                                                                                                                                                                                                                     |         |
| 56 | <b>Appendices</b>             |     |                                                                                                                                                                                                                                                                                     |         |
| 57 |                               |     |                                                                                                                                                                                                                                                                                     |         |
| 58 |                               |     |                                                                                                                                                                                                                                                                                     |         |
| 59 |                               |     |                                                                                                                                                                                                                                                                                     |         |
| 60 |                               |     |                                                                                                                                                                                                                                                                                     |         |

|                            |    |                                                                                                                                                                                                |     |
|----------------------------|----|------------------------------------------------------------------------------------------------------------------------------------------------------------------------------------------------|-----|
| Informed consent materials | 32 | Model consent form and other related documentation given to participants and authorised surrogates                                                                                             | N/A |
| Biological specimens       | 33 | Plans for collection, laboratory evaluation, and storage of biological specimens for genetic or molecular analysis in the current trial and for future use in ancillary studies, if applicable | N/A |

\*It is strongly recommended that this checklist be read in conjunction with the SPIRIT 2013 Explanation & Elaboration for important clarification on the items. Amendments to the protocol should be tracked and dated. The SPIRIT checklist is copyrighted by the SPIRIT Group under the Creative Commons "[Attribution-NonCommercial-NoDerivs 3.0 Unported](#)" license.

**Table 1. CS-COUSIN Core Domain Development Process Guidance Checklist**

| Requirement                                                  | Item No. | Explanation                                                                                                                                                                                                                                                                                                                                                                       | Page            |
|--------------------------------------------------------------|----------|-----------------------------------------------------------------------------------------------------------------------------------------------------------------------------------------------------------------------------------------------------------------------------------------------------------------------------------------------------------------------------------|-----------------|
| <b>Title/Abstract</b>                                        |          |                                                                                                                                                                                                                                                                                                                                                                                   |                 |
| Title                                                        | 1        | Identify in the title that the protocol is about the development of COS domains and specify disease / population of interest.                                                                                                                                                                                                                                                     | Pg 1            |
| Abstract                                                     | 2        | Provide a structured summary.                                                                                                                                                                                                                                                                                                                                                     | Pg 3            |
| <b>Introduction</b>                                          |          |                                                                                                                                                                                                                                                                                                                                                                                   |                 |
| Scientific background and relevance                          | 3        | Provide an overview of the need of the COS (more detailed than in the proposal form).                                                                                                                                                                                                                                                                                             | Pg 6            |
| Objectives                                                   | 4        | State your objectives.                                                                                                                                                                                                                                                                                                                                                            | Pg 7            |
| Define scope and applicability of the COS                    | 5        | Describe the setting(s) including geographical region, health condition(s), population(s), and intervention(s).                                                                                                                                                                                                                                                                   | Pg 7            |
| <b>Methods</b>                                               |          |                                                                                                                                                                                                                                                                                                                                                                                   |                 |
| Workplan and milestones                                      | 6        | Describe work packages (e.g. protocol development, registration, literature search, databases).<br>Specify the expected results of each work package.<br>Provide the milestones (planned timelines for the work packages).                                                                                                                                                        | Beginning pg. 8 |
| COS development group                                        | 7        | Describe the COS project team consisting of at least patients, clinicians, and methodologists (and if applicable, Steering Committee and/or Advisory group members).                                                                                                                                                                                                              | Pg 8            |
| Method for involving Stakeholders                            | 8        | Describe who your stakeholders will be and how stakeholders will be contacted and involved. Describe the eligibility criteria for stakeholders for each group. Describe in detail how you will involve the patient perspective, healthcare professionals and provide (if possible at this stage) a list of potential representatives and stakeholders: names, affiliation, roles. | Pg 9-10         |
| Method for the <u>identification</u> of core outcome domains | 9        | Provide a detailed plan for the identification of the core outcome domains (e.g. literature searches, focus groups, interviews).                                                                                                                                                                                                                                                  | Pg 9            |



|                                                                                            |    |                                                                                                                                                                                                                                                                                                                                                                           |          |
|--------------------------------------------------------------------------------------------|----|---------------------------------------------------------------------------------------------------------------------------------------------------------------------------------------------------------------------------------------------------------------------------------------------------------------------------------------------------------------------------|----------|
| Consensus Process and Definition, Method for the <u>definition</u> of core outcome domains | 10 | Provide a detailed plan for conducting the consensus process (e.g. Delphi study, face to face group meetings).<br><br>Describe the proposed consensus definition.<br><br>Describe the analysis plan (i.e. how outcome domains will be scored and how scores will be summarized).<br>Describe the consensus definition and criteria for including/dropping/adding domains. | Pg 10-12 |
| Ethics and consent                                                                         | 11 | Describe the ethics and consent issues. If this is not applicable please state this.                                                                                                                                                                                                                                                                                      | Pg 15    |
| Results                                                                                    | 12 | Describe broadly how you will present your expected results.                                                                                                                                                                                                                                                                                                              | Pg 15    |
| <b>Other Information</b>                                                                   |    |                                                                                                                                                                                                                                                                                                                                                                           |          |
| Dissemination and Publication                                                              | 13 | Develop a dissemination and implementation plan.                                                                                                                                                                                                                                                                                                                          | Pg 15    |
| Future research plan for developing a core set of outcome measurement instruments          | 14 | Indicate if you intend to develop a core set of outcome measurement instruments for your identified core outcome domains and how you would do this.                                                                                                                                                                                                                       | N/A      |
| Funding, Conflict of interest                                                              | 15 | State any sources of funding that you have received or plan to apply for and conflicts of interest (e.g. development or copyright for any instruments in this area, involvement in any other COS, involvement in any related groups).                                                                                                                                     | Pg 17    |
| Timeline                                                                                   | 16 | Please indicate the intended timeline from the study start until the Core Set of outcome domains will be completed                                                                                                                                                                                                                                                        | Pg 14    |

**Table 2. COS-STAP (The Core Outcome Set-STANDARDISED Protocol Items) Statement Checklist**

| REQUIREMENT               |    |                                                                                                                                                                                                                                                                                       | Page     |
|---------------------------|----|---------------------------------------------------------------------------------------------------------------------------------------------------------------------------------------------------------------------------------------------------------------------------------------|----------|
| TITLE/ABSTRACT            |    |                                                                                                                                                                                                                                                                                       |          |
| Title                     | 1a | Identify in the title that the paper describes the protocol for the planned development of a COS                                                                                                                                                                                      | Pg 1     |
| Abstract                  | 1b | Provide a structured abstract                                                                                                                                                                                                                                                         | Pg 3     |
| INTRODUCTION              |    |                                                                                                                                                                                                                                                                                       |          |
| Background and objectives | 2a | Describe the background and explain the rationale for developing the COS and identify the reasons why a COS is needed and the potential barriers to its implementation.                                                                                                               | Pg 6     |
|                           | 2b | Describe the specific objectives with reference to developing a COS                                                                                                                                                                                                                   | Pg 7     |
| Scope                     | 3a | Describe the health condition(s) and population(s) that will be covered by the COS                                                                                                                                                                                                    | Pg 7     |
|                           | 3b | Describe the intervention(s) that will be covered by the COS                                                                                                                                                                                                                          | Pg 7     |
|                           | 3c | Describe the context of use for which the COS is to be applied                                                                                                                                                                                                                        | Pg 7     |
| METHODS                   |    |                                                                                                                                                                                                                                                                                       |          |
| Stakeholders              | 4  | Describe the stakeholder groups to be involved in the COS development process, the nature of and rationale for their involvement and also how the individuals will be identified; this should cover involvement both as members of the research team and as participants in the study | Pg 9-10  |
| Information sources       | 5a | Describe the information sources that will be used to identify the list of outcomes. Outline the methods or reference other protocols/papers                                                                                                                                          | Pg 9     |
|                           | 5b | Describe how outcomes may be dropped/combined, with reasons                                                                                                                                                                                                                           | Pg 10    |
| Consensus process         | 6  | Describe the plans for how the consensus process will be undertaken                                                                                                                                                                                                                   | Pg 10-12 |
| Consensus definition      | 7a | Describe the consensus definition                                                                                                                                                                                                                                                     | Pg 13    |

|                                  |    |                                                                                                                                                                                                      |           |
|----------------------------------|----|------------------------------------------------------------------------------------------------------------------------------------------------------------------------------------------------------|-----------|
|                                  | 7b | Describe the procedure for determining how outcomes will be added/combined/dropped from consideration during the consensus process                                                                   | Pg 13     |
| ANALYSIS                         |    |                                                                                                                                                                                                      |           |
| Outcome scoring/feedback         | 8  | Describe how outcomes will be scored and summarised, describe how participants will receive feedback during the consensus process                                                                    | Pg 10     |
| Missing data                     | 9  | Describe how missing data will be handled during the consensus process                                                                                                                               | Pg 13     |
| ETHICS and DISSEMINATION         |    |                                                                                                                                                                                                      |           |
| Ethics approval/informed consent | 10 | Describe any plans for obtaining research ethics committee/institutional review board approval in relation to the consensus process and describe how informed consent will be obtained (if relevant) | Pg 15     |
| Dissemination                    | 11 | Describe any plans to communicate the results to study participants and COS users, inclusive of methods and timing of dissemination                                                                  | Pg 15     |
| ADMINISTRATIVE INFORMATION       |    |                                                                                                                                                                                                      |           |
| Funders                          | 12 | Describe sources of funding, role of funders                                                                                                                                                         | Pg 17     |
| Conflicts of interest            | 13 | Describe any potential conflicts of interest within the study team and how they will be managed                                                                                                      | Pg 17 -18 |

# BMJ Open

## Protocol for Development of a Core Outcome Set for Clinical Trials in Melasma

|                                 |                                                                                                                                                                                                                                                                                                                                                                                                                                                                                                                                                                                                                                                                                                                                                                                                                                                                                                                                  |
|---------------------------------|----------------------------------------------------------------------------------------------------------------------------------------------------------------------------------------------------------------------------------------------------------------------------------------------------------------------------------------------------------------------------------------------------------------------------------------------------------------------------------------------------------------------------------------------------------------------------------------------------------------------------------------------------------------------------------------------------------------------------------------------------------------------------------------------------------------------------------------------------------------------------------------------------------------------------------|
| Journal:                        | <i>BMJ Open</i>                                                                                                                                                                                                                                                                                                                                                                                                                                                                                                                                                                                                                                                                                                                                                                                                                                                                                                                  |
| Manuscript ID                   | bmjopen-2020-046953.R2                                                                                                                                                                                                                                                                                                                                                                                                                                                                                                                                                                                                                                                                                                                                                                                                                                                                                                           |
| Article Type:                   | Protocol                                                                                                                                                                                                                                                                                                                                                                                                                                                                                                                                                                                                                                                                                                                                                                                                                                                                                                                         |
| Date Submitted by the Author:   | 29-Dec-2021                                                                                                                                                                                                                                                                                                                                                                                                                                                                                                                                                                                                                                                                                                                                                                                                                                                                                                                      |
| Complete List of Authors:       | Ibrahim, Sarah; Northwestern University Feinberg School of Medicine, Dermatology<br>Kang, Bianca; Northwestern University Feinberg School of Medicine, Dermatology<br>Schlessinger, Daniel; Washington University in St Louis, Dermatology<br>Chiren, Sarah; Northwestern University Feinberg School of Medicine, Dermatology<br>Tang, Jennifer; University of Miami Miller School of Medicine<br>Kirkham, Jamie J.; Manchester University, Biostatistics<br>Schmitt, Jochen; Medical Faculty Carl Gustav Carus, Technical University<br>Dr.esden, Center for Evidence-based Healthcare<br>Poon, Emily; Northwestern University Feinberg School of Medicine, Dermatology<br>Maher, Ian; University of Minnesota<br>Sobanko, Joseph; University of Pennsylvania Health System<br>Cartee, Todd; Penn State Health Milton S Hershey Medical Center<br>Alam, Murad; Northwestern University Feinberg School of Medicine, Dermatology |
| <b>Primary Subject Heading</b>: | Dermatology                                                                                                                                                                                                                                                                                                                                                                                                                                                                                                                                                                                                                                                                                                                                                                                                                                                                                                                      |
| Secondary Subject Heading:      | Research methods                                                                                                                                                                                                                                                                                                                                                                                                                                                                                                                                                                                                                                                                                                                                                                                                                                                                                                                 |
| Keywords:                       | Protocols & guidelines < HEALTH SERVICES ADMINISTRATION & MANAGEMENT, Clinical trials < THERAPEUTICS, DERMATOLOGY                                                                                                                                                                                                                                                                                                                                                                                                                                                                                                                                                                                                                                                                                                                                                                                                                |
|                                 |                                                                                                                                                                                                                                                                                                                                                                                                                                                                                                                                                                                                                                                                                                                                                                                                                                                                                                                                  |

SCHOLARONE™  
Manuscripts

## 1 Protocol for Development of a Core Outcome Set for Clinical Trials in 2 Melasma

3 Sarah A. Ibrahim, BA<sup>1</sup>; Bianca Y. Kang, BS<sup>1</sup>; Daniel I. Schlessinger, MD<sup>2</sup>; Sarah G. Chiren,  
4 BA<sup>1</sup>; Jennifer C. Tang, MD<sup>3</sup>; Jamie J. Kirkham, PhD<sup>4</sup>; Jochen Schmitt, MD<sup>5</sup>; Emily Poon,  
5 PhD<sup>1</sup>; Ian A. Maher, MD<sup>6</sup>; Joseph F. Sobanko, MD<sup>7,8</sup>; Todd V. Cartee, MD<sup>9</sup>; Murad Alam, MD,  
6 MSCI, MBA<sup>1,10,11</sup>

7 <sup>1</sup>Department of Dermatology, Feinberg School of Medicine, Northwestern University, Chicago,  
8 IL, USA.

9 <sup>2</sup>Division of Dermatology, Department of Internal Medicine, Washington University in St.  
10 Louis, St. Louis, MO, USA.

11 <sup>3</sup>Department of Dermatology and Cutaneous Surgery, University of Miami Miller School of  
12 Medicine, Miami, FL, USA.

13 <sup>4</sup>Centre for Biostatistics, Manchester Academic Health Science Centre, University of  
14 Manchester, Manchester, United Kingdom.

15 <sup>5</sup>Centre for Evidence-Based Healthcare, Medizinische Fakultät Carl Gustav Carus, TU Dresden,  
16 Dresden, Germany.

17 <sup>6</sup>Department of Dermatology, University of Minnesota, Minneapolis, MN, USA.

18 <sup>7</sup>Department of Dermatology, University of Pennsylvania, Philadelphia, PA, USA.

19 <sup>8</sup>Division of Dermatologic Surgery, University of Pennsylvania, Philadelphia, PA, USA.

20 <sup>9</sup>Department of Dermatology, Penn State Health, Hershey, PA, USA.

21 <sup>10</sup>Department of Otolaryngology, Feinberg School of Medicine, Northwestern University,  
22 Chicago, IL, USA.

23 <sup>11</sup>Department of Surgery, Feinberg School of Medicine, Northwestern University, Chicago, IL,  
24 USA.

### 25 Corresponding Author:

26 Murad Alam, MD  
27 Northwestern University Department of Dermatology  
28 676 N. St. Clair, Suite 1600  
29 Chicago, Illinois 60611  
30 Phone: (312) 695-6647; Fax: (312) 695-0044  
31 [m-alam@northwestern.edu](mailto:m-alam@northwestern.edu)

1  
2  
3 44  
4 45  
5 46  
6 47  
7 48  
8  
9

**Word Count** Abstract: 298 Manuscript: 3557/4000

**Keywords:** core outcome set, protocol, development, clinical trials, melasma

10  
11  
12  
13  
14  
15  
16  
17  
18  
19  
20  
21  
22  
23  
24  
25  
26  
27  
28  
29  
30  
31  
32  
33  
34  
35  
36  
37  
38  
39  
40  
41  
42  
43  
44  
45  
46  
47  
48  
49  
50  
51  
52  
53  
54  
55  
56  
57  
58  
59  
60

For peer review only

1  
2  
3 49 **ABSTRACT**

4  
5 50 **Introduction:** Melasma is a pigmentation disorder of the skin. Characterized by brown to gray-  
6  
7 brown patches on the face and neck, the condition predominantly affects women and has been  
8  
9 associated with pregnancy, hormonal variation, and sun exposure. Melasma can be disfiguring  
10  
11 52 associated with pregnancy, hormonal variation, and sun exposure. Melasma can be disfiguring  
12  
13 53 and anxiety-provoking, and quality of life is often adversely impacted. Management includes sun  
14  
15 54 protection, laser and energy device therapy, topical and oral skin-bleaching agents, and chemical  
16  
17 55 peels. While clinical trials of melasma exist, there is a lack of consistency in reported outcomes,  
18  
19 56 which has been a barrier to the aggregation of data in systematic reviews and meta-analyses. This  
20  
21 57 protocol describes a planned process for development of a minimum set of outcomes (i.e., “core  
22  
23 58 outcome set”) that should be measured in all clinical trials of melasma.

24  
25  
26 59 **Methods and Analysis:** An exhaustive list of potential outcomes will be extracted from four  
27  
28 60 sources: 1) systematic literature review of outcomes in clinical trials; 2) semi-structured patient  
29  
30 61 interviews; 3) brochures, pamphlets, clinical trial registries, and other published and unpublished  
31  
32 62 sources and documentation; and 4) interviews with non-patient, non-physician stakeholders,  
33  
34 63 including federal regulators, industry scientists, and non-physician providers. An international  
35  
36 64 two-round Delphi process will then be performed to identify the outcomes deemed most  
37  
38 65 important to patients and physicians. Subsequently, a consensus meeting will be convened to  
39  
40 66 review and process the results, and to vote on a final set of core outcomes.

41  
42  
43  
44 67 **Ethics and Dissemination:** Ethics approval was provided by the Northwestern University  
45  
46 68 Institutional Review Board (IRB) (protocol ID: STU00201637). This study is registered with  
47  
48 69 both the COMET and CS-COUSIN initiatives, and this protocol is in accordance with the  
49  
50 70 guidelines for protocol development of both groups. All findings from the study described in this  
51  
52  
53  
54  
55  
56  
57  
58  
59  
60

1  
2  
3 71 protocol will be disseminated to all stakeholders involved in the development process and will be  
4  
5 72 submitted for publication in peer-reviewed journals.  
6  
7  
8 73  
9  
10  
11  
12  
13  
14  
15  
16  
17  
18  
19  
20  
21  
22  
23  
24  
25  
26  
27  
28  
29  
30  
31  
32  
33  
34  
35  
36  
37  
38  
39  
40  
41  
42  
43  
44  
45  
46  
47  
48  
49  
50  
51  
52  
53  
54  
55  
56  
57  
58  
59  
60

For peer review only



1  
2  
3 74 **ARTICLE SUMMARY**  
4

5 75 **Strengths and Limitations of This Study**  
6  
7

- 8 76 • This protocol describes a planned process for the development of a minimum set of  
9  
10 77 outcomes (i.e., “core outcome set”) that should be measured in all clinical trials of  
11  
12 78 melasma.  
13  
14 79 • A long list of potential outcomes will be extracted from a systematic literature review,  
15  
16 80 semi-structured interviews, brochures and pamphlets, clinical trial registries, and other  
17  
18 81 published and unpublished sources and documentation.  
19  
20 82 • An international group of stakeholders, including patients, physicians, federal regulators,  
21  
22 83 industry scientists, pharmacologists and pharmacists, nurses, and non-physician providers  
23  
24 84 will be included in the process.  
25  
26 85 • At least two rounds of Delphi process will then be performed to identify a provisional list  
27  
28 86 of outcomes meeting a 70% consensus level for patient and physicians, followed by the  
29  
30 87 convening of a consensus meeting to review and process the results, and to vote on a final  
31  
32 88 set of core outcomes.  
33  
34 89 • This COS will establish “what” should be measured, but not “how” or “when,” which  
35  
36 90 will be defined in later development of core outcome measure set for melasma.  
37  
38  
39  
40  
41  
42  
43  
44 91  
45  
46  
47  
48  
49  
50  
51  
52  
53  
54  
55  
56  
57  
58  
59  
60

## 92 INTRODUCTION

93 Melasma is a chronic hyperpigmentation disorder primarily occurring in women.<sup>1,2</sup> The  
94 condition is characterized by brown, irregularly shaped macules and patches, commonly of the  
95 bilateral upper cheeks, mid forehead, and upper lip. Predisposing risk factors for the  
96 development of melasma include darker skin types III and IV, genetic predisposition, ultraviolet  
97 radiation, and hormonal changes due to pregnancy, menopause, or medications.<sup>3-5</sup> However,  
98 melasma remains a poorly understood condition that also arises in the absence of traditional risk  
99 factors, with a significant minority of cases occurring in men.<sup>6</sup> Histologically, there is an  
100 increase of melanocytes and solar elastosis in the epidermis of melasma lesions compared to  
101 normal skin.<sup>2,4,7</sup> Due to its sometimes striking impact on cosmetic appearance, melasma can  
102 cause psychological distress, thereby negatively affecting quality of life.<sup>3</sup>

103 Melasma is typically divided into three subtypes (epidermal, dermal, or mixed) and can  
104 be classified via Wood's Lamp examination. Severity of lesions and area of involvement can be  
105 assessed using validated or more *ad hoc* measurement tools. Melasma has been treated with  
106 various modalities, including lasers and lights, chemical peels, skin-bleaching agents, such as  
107 hydroquinone, or oral agents, like tranexamic acid.<sup>1,8</sup> However, current treatments are of limited  
108 efficacy and recurrence is the norm. Additionally, extant studies seldom assess patient-reported  
109 outcomes, which are particularly relevant given the disfiguring nature of melasma.

110 Systematic reviews of treatments for melasma are limited in utility by the lack of  
111 standardization in outcomes across trials.<sup>8</sup> The selective inclusion of outcomes in publications,  
112 so-called selective outcome reporting bias, remains a problem in the reporting of clinical trials.  
113 In particular, the heterogeneity of outcomes reported across trials may affect the  
114 recommendations and conclusions of systematic reviews.<sup>9</sup> In order to address the heterogeneity

1  
2  
3 115 of outcomes in clinical trials of the same disease or condition, The Core Outcome Measures in  
4  
5 116 Effectiveness Trials (COMET) initiative was created, with the goal of providing methodological  
6  
7  
8 117 support to facilitate development of standardized core outcome sets to be measured in health-  
9  
10 118 related research.<sup>10</sup> A core outcome set (COS) is defined as a consensus-derived set of outcomes  
11  
12 119 that are measured at minimum in all clinical studies of a given condition or disease. Similarly,  
13  
14 120 another group, the Cochrane Skin - Core Outcome Set Initiative (CS-COUSIN), was developed  
15  
16 121 specifically to address core outcome sets in dermatology.<sup>11</sup> CS-COUSIN provides  
17  
18 122 methodological support, and much of its approach is based on the experience of the Harmonizing  
19  
20 123 Outcome Measures for Eczema (HOME) initiative.<sup>12-16</sup>

21  
22  
23  
24 124 To date, there has been no core outcome set published specifically for melasma. The data  
25  
26 125 obtained from the investigation described in this protocol will define the minimum set of  
27  
28 126 outcomes that should be reported in future clinical trials of melasma interventions.

### 31 127 **Objective**

32  
33  
34 128 The aim of this study will be to develop a COS through an international consensus  
35  
36 129 process, for use in future clinical trials of melasma. The objective is to determine what outcomes  
37  
38 130 should be reported as a minimum in future clinical trials of melasma.

### 41 131 **Scope of this COS**

42  
43  
44  
45 132 This COS is envisioned as the global standard for all clinical trials examining the efficacy  
46  
47 133 and safety of all melasma interventions, including both early and late phase trials. The COS to be  
48  
49 134 developed is intended to apply to all individuals with melasma, regardless of age, gender, and  
50  
51 135 ethnicity.

1  
2  
3 136 This COS will establish “what” should be measured, but not “how” or “when,” which  
4  
5  
6 137 will be defined in a later consensus study specific to outcome measures.  
7

## 8 138 **METHODS AND ANALYSIS**

9  
10 139 This study was designed using guidance provided by the CS-COUSIN and COMET  
11  
12 140 initiatives and has been registered with both organizations.<sup>17–20</sup> Additional guidance was  
13  
14 141 provided by the Harmonising Outcome Measures for Eczema (HOME) roadmap.<sup>16</sup> The reporting  
15  
16 142 of this protocol conforms to the COS-STAP (The Core Outcome Set-STANDARDISED Protocol  
17  
18 143 Items) Statement checklist and the CS-COUSIN Core Domain Development Process  
19  
20 144 guidance.<sup>18,21</sup> This protocol is also based on prior work in protocol development by the  
21  
22 145 Measurement of Priority Outcome Variables in Dermatologic Surgery (IMPROVED) Group, a  
23  
24 146 core outcome set development organization for dermatologic surgery-related conditions.<sup>22</sup>  
25  
26  
27  
28

### 29 147 **Study Oversight**

30  
31 148 The international study steering committee developing this COS will include four  
32  
33 149 physicians (MA, IAM, JFS, TVC) as well as a patient representative. The latter, who will also  
34  
35 150 have melasma, will represent others with this condition by providing input at key points to  
36  
37 151 ensure that the patient perspective is incorporated. The four physicians have prior experience in  
38  
39 152 developing core outcome sets in dermatology and therefore also act as researchers in COS  
40  
41 153 development. The steering committee will lead each stage of COS development and ensure  
42  
43 154 methodological quality throughout the study. In addition, an independent member of the CS-  
44  
45 155 COUSIN Methods Group (JJK) will provide guidance on the most current methodological  
46  
47 156 recommendations for COS development.  
48  
49  
50  
51

### 52 157 **Study Design**

#### 53 54 55 158 *Identification of Outcomes*

1  
2  
3 159 A long list of outcomes will be generated from four sources. First, a systematic review of  
4  
5 160 the literature, which has been registered prospectively with the International Prospective Register  
6  
7 161 of Systematic Reviews (PROSPERO, CRD42020214189), will be performed to identify and  
8  
9  
10 162 extract outcomes measured in randomized controlled trials of melasma. Specifically, with the  
11  
12 163 help of a medical librarian, PubMed/Medline and Embase will be searched for the period 2006-  
13  
14 164 16 to detect English language human RCTs including, but not limited to, the following terms:  
15  
16  
17 165 [(melasma [title/abstract]) AND (randomized controlled trial [publication type]) AND (treatment  
18  
19 166 OR therapy OR therapeutics)]. RCTs will be used to identify outcomes of interest, since it is  
20  
21 167 usual and customary in COS methodology to focus on RCTs when they are available in  
22  
23 168 sufficient variety and quantity.<sup>23-26</sup> Inclusion criteria will be studies that: (1) are randomized and  
24  
25 169 controlled; (2) assess the efficacy and/or safety of one or more interventions for treatment of  
26  
27 170 melasma; (3) are available in the English language; (4) and involve human subjects. Articles will  
28  
29 171 be excluded if they: (1) were published as a poster or conference abstract; or (2) the full text of  
30  
31 172 the article is unavailable. Articles will be independently screened for eligibility by two  
32  
33 173 investigators, and disagreements will be resolved by a third investigator. Two independent  
34  
35 174 reviewers will then extract outcomes from individual studies. During extraction, quality of life  
36  
37 175 (QoL) outcomes will be separated into distinct categories to ensure all of the various components  
38  
39 176 of QoL that have been measured in previous investigations are included as possible core  
40  
41 177 outcomes. Outcome measures will also be extracted during this step, and this data will be  
42  
43 178 recorded for the future development of a core outcome measure set for melasma.<sup>27</sup> The results of  
44  
45 179 the systematic review will be published separately from the COS.  
46  
47  
48  
49  
50  
51  
52  
53  
54  
55  
56  
57  
58  
59  
60

1  
2  
3 180 Second, other printed and electronic sources, including clinical trial registries,<sup>1</sup> patient  
4  
5 181 pamphlets,<sup>2</sup> medical society brochures, and relevant FDA/EMA guidance documents, will be  
6  
7 182 reviewed to identify any additional outcomes not detected in the systematic review. Third,  
8  
9  
10 183 outcomes valued by patients will be identified by conducting semi-structured interviews with  
11  
12 184 patients diagnosed with melasma.<sup>3</sup> These interviews will be audio-recorded, transcribed, and  
13  
14  
15 185 analyzed by the methods of qualitative research to find outcomes considered relevant by patients.  
16  
17 186 Fourth, semi-structured interviews will be performed to identify any remaining outcomes  
18  
19 187 deemed relevant by representatives of key non-physician, non-patient stakeholder classes,  
20  
21 188 including industry scientists,<sup>4</sup> pharmacologists and pharmacists, drug and device safety  
22  
23  
24 189 regulators<sup>5</sup>, nurses, and physician assistants. Semi-structured interviews with patients and other  
25  
26 190 stakeholders will be conducted by investigators who have been trained in this qualitative  
27  
28 191 research technique. Specifically, such interviews will be comprised of a series of open-ended  
29  
30  
31 192 questions, followed by pre-established prompts, in the event that respondents are unclear as to  
32  
33 193 the primary question. At the end of the semi-structured interview, stakeholders will be asked to

---

36  
37 <sup>1</sup> Clinicaltrials.gov searched for “melasma”, 2017-2021, no exclusion criteria.

38  
39 <sup>2</sup> American Academy of Dermatology website searched for “melasma”, with inclusion criteria being “all patient  
40 education material”, and no exclusion criteria.

41  
42 <sup>3</sup> The Electronic Data Warehouse (EDW) of outpatient dermatology clinics at Northwestern University will be  
43 searched to identify patients who have received consultations or treatments for melasma. At least 20 patients will be  
44 contacted by telephone for interviews. Those who agree to respond will each be scheduled via email for a 30-minute  
45 interview.

46  
47 <sup>4</sup> Leaders at a purposive sample of large, medium-sized, and small US drug, device, and cosmetic companies  
48 involved in research on products for melasma will be contacted to ask for identification of qualified industry  
49 scientists in their employ who can help identify additional outcomes. In total, up to 20 industry scientists will be  
50 contacted.

51  
52 Drug and device safety regulators from the countries most represented in the systematic review will be contacted for  
53 interviews. When their names are publicly available, officials from dermatology or cosmetic-related offices within  
54 these regulatory agencies will be contacted first.

55  
56 <sup>5</sup> US Food and Drug Administration, European Medicines Agency, Ministry of Food and Drug Safety (Korean),  
57 Pharmaceuticals and Medical Devices Agency (Japan), Health Canada, Brazilian Health Regulatory Agency  
58 (ANVISA).

1  
2  
3 194 volunteer any additional information about the topic that they may wish to share. Interviewers  
4  
5 195 will be strictly prohibited from using off-script leading questions that may bias data collection.  
6  
7 196 After the semi-structured interviews are completed, they will be transcribed, and the iterative  
8  
9  
10 197 methods of qualitative methods will be used to extract common themes. These themes, if not  
11  
12 198 already present in the list of outcomes, will then be used to create new outcomes that will be  
13  
14 199 appended to the long list. Non-physician, non-patient stakeholders will not be invited to  
15  
16  
17 200 participate in the subsequent Delphi process but will be invited to the final consensus meeting.  
18  
19

### 20 201 *Final Review of Long List of Outcomes*

21  
22  
23 202 The outcomes obtained from the sources above will be collated into a long list of  
24  
25 203 provisional outcomes. Members of the steering committee will review and condense this list,  
26  
27 204 eliminating duplicate items and combining items when possible, without loss of content. In  
28  
29  
30 205 accordance with the proposed definition of a unique outcome by Young et al., unique outcomes  
31  
32 206 (i.e., outcomes with “original meaning and context”) will be preserved, and other outcomes (i.e.,  
33  
34 207 those “with different words, phrasing, or spelling addressing the same concept and context”) will  
35  
36  
37 208 be lumped together.<sup>28</sup> The list of outcomes will then be placed into appropriate domains by two  
38  
39 209 steering committee members using the COMET and CS-COUSIN taxonomies.<sup>29,30</sup> Lay  
40  
41 210 definitions will be appended to all outcomes and reviewed by the melasma steering group patient  
42  
43 211 representative to assure that patient stakeholders can actively participate in the forthcoming  
44  
45  
46 212 Delphi consensus process.  
47  
48

### 49 213 *Delphi Participants*

50  
51  
52 214 Two separate groups, consisting of physicians and patients, respectively, will be invited  
53  
54 215 to take part in the Delphi process. A global context will be provided by inviting physicians from  
55  
56  
57  
58  
59  
60

1  
2  
3 216 the United States and from other countries on various continents, including a range of ethnicities.  
4  
5 217 To include the perspective of researchers, the senior authors of all clinical trials extracted in our  
6  
7 218 literature review will be included in the physician group. Eligible physician stakeholders will  
8  
9 219 include dermatologists, clinical researchers, primary care providers, and other medical specialists  
10  
11 220 who have experience treating melasma. Demographic information, including participants'  
12  
13 221 ethnicity, gender, and specialty will be recorded. To account for potential dropouts, at least 100  
14  
15 222 physicians meeting any of the following criteria will be invited: corresponding author of a  
16  
17 223 clinical trial of melasma included in our systematic review; among the most frequently  
18  
19 224 published authors on melasma treatment, as identified through electronic databases; recent  
20  
21 225 lecturer on the topic of melasma at national or international dermatology professional society  
22  
23 226 meetings in any country; or a member of a national or international dermatologic society<sup>6</sup> with  
24  
25 227 clinical expertise in melasma treatment, as demonstrated by committee or other affiliations.  
26  
27  
28  
29  
30

31 228 Physicians who agree to participate will be asked to identify one or more melasma  
32  
33 229 patients who may be invited to join the patient Delphi group, with a goal of 15 patient  
34  
35 230 stakeholders participating in the Delphi. All recruitment will be done by our study team and will  
36  
37 231 be approved by our ethics committee. However, this will not entail limiting patient recruitment  
38  
39 232 from our site only, since we will be asking physician Delphi participants located elsewhere to  
40  
41 233 volunteer patients who may choose to participate in the study. Such patient volunteers will  
42  
43  
44  
45

---

47 <sup>6</sup> Representative board members of the following societies will be invited to participate as individuals in the Delphi  
48 to ensure inclusion of the perspectives of expert clinicians and researchers who may not have recently published in  
49 the literature: American Academy of Dermatology Association; American Society for Laser Medicine and Surgery;  
50 African Society of Dermatology and Venereology; Asian Academy of Dermatology and Venereology; Arab  
51 Academy of Dermatology and Aesthetics; Argentine Society of Dermatology; Brazilian Society of Dermatology;  
52 British Association of Dermatologists; Canadian Dermatology Association; European Academy of Dermatology and  
53 Venereology; French Society of Dermatology; Mexican Society of Dermatology; Skin of Color Society; World  
54 Congress of Dermatology.  
55  
56  
57  
58  
59



1  
2  
3 234 contact the research staff at our site, who will consent and enroll them, if appropriate. Additional  
4  
5 235 methods will be taken to ensure patient involvement throughout the study, including: (1)  
6  
7 236 specifying patient involvement in the Institutional Review Board (IRB) protocol; (2) seeking  
8  
9 237 relevant input from patients; (3) maintenance of investigator open-mindedness to the patient  
10  
11 238 perspective; (4) careful reviewing of all outcomes with patient representatives; (5) thorough note  
12  
13 239 taking; (6) taking time to reflect on patient feedback; and (7) identifying and engaging a diverse  
14  
15 240 group of patient participants.<sup>31</sup>  
16  
17  
18  
19

#### 20 241 *Modified Delphi Process*

21  
22  
23 242 From the long list of potential outcomes vetted by the steering committee, a core set of  
24  
25 243 outcomes will be provisionally selected by stakeholders through a Delphi process, as  
26  
27 244 recommended by the COMET and CS-COUSIN initiatives.<sup>17,18,30</sup> Specifically, each Delphi  
28  
29 245 participant will be asked to rate each outcome for its level of importance on a scale from 1-9.  
30  
31 246 Average ratings for each outcome, and relevant participant comments, will then be redistributed  
32  
33 247 to each survey participant, who will have the option of changing his or her earlier ratings based  
34  
35 248 on the additional information surfaced in this process. Prior to a consensus meeting, at least two  
36  
37 249 Delphi rounds will be conducted using DelphiManager software available for this purpose from  
38  
39 250 COMET.  
40  
41  
42  
43

#### 44 251 *Delphi Rounds*

45  
46  
47 252 During each Delphi round, the provisional outcomes in the long list will be presented to  
48  
49 253 each participant for rating. Participants will rate each outcome on a 9-point scale developed by  
50  
51 254 the Grading of Recommendations Assessment, Development and Evaluation (GRADE) working  
52  
53 255 group, with “9” denoting “critically important” and “1,” “not that important.”<sup>32</sup> In each round,  
54  
55  
56  
57  
58  
59  
60

1  
2  
3 256 each participant will have the option to select “10” if they are uncertain about an outcome’s need  
4  
5 257 for inclusion. Also in each round, each participant will have the option to identify new outcomes  
6  
7 258 that they feel should be added in the subsequent round. All previously included outcomes will be  
8  
9  
10 259 carried to the next round. Participants will have 3 weeks to complete each Delphi round, and will  
11  
12 260 receive weekly reminders until they do, or time expires.

13  
14  
15 261 Results from Round 1 will be analyzed by outcome and for each stakeholder group.  
16  
17 262 After Round 1, a virtual meeting will be held with participants to discuss the results of the first  
18  
19 263 round, and to allow participants to share their thoughts about items they found particularly  
20  
21 264 salient or controversial. Then, Round 2 will commence. In Round 2, participants will be  
22  
23 265 graphically shown the distribution of scores for each item for each stakeholder group from  
24  
25 266 Round 1, and also their own individual ratings for each outcome from the previous round, and  
26  
27 267 asked to score each item again. New outcomes will be added to Round 2 if suggested by two or  
28  
29 268 more participants in Round 1, if the steering committee determines the suggested outcome(s) to  
30  
31 269 be unique from existing outcomes.<sup>28</sup>

32  
33  
34 270 Summarized scores from Round 2, analyzed by outcome and for each stakeholder group,  
35  
36 271 will be presented at the consensus meeting. Attrition is possible between Delphi rounds, and  
37  
38 272 although numeric data (e.g., mean, median, and range of scores) from Round 2 alone will be  
39  
40 273 analyzed and presented at the consensus meeting, written feedback from both rounds will be  
41  
42 274 collated and discussed at the consensus meeting, as well.

#### 43 275 *Definition of Provisional Consensus*

44  
45  
46 276 Outcomes will be *retained* in the provisional consensus pool if 70% of the participants  
47  
48 277 score 7, 8, or 9 with less than 15% scoring 1-3.<sup>33</sup> Outcomes will be *removed* from the provisional  
49  
50 278 consensus pool if 70% or more of the participants score 1, 2, or 3 and less than 15% score 7- 9.

1  
2  
3 279 To avoid having a core outcome set that entails too many items, if the provisional list of included  
4  
5 280 outcomes is longer than expected, participants at the consensus meeting will be urged to further  
6  
7  
8 281 refine and abbreviate this list. The definition of consensus is based on previous, published COS  
9  
10 282 consensus methodology, and guidance of the COMET Methodology Group.<sup>17,34–36</sup> Outcomes  
11  
12 283 that have not reached consensus will also be retained for discussion during the consensus  
13  
14  
15 284 meeting.

### 17 285 *Consensus Meeting*

19  
20 286 A series of virtual consensus meetings will be held to discuss the results of the Delphi, to  
21  
22 287 review the provisional core outcome set as well as the outcomes for which consensus has not  
23  
24  
25 288 been reached, and to move towards selection of a final core outcome set. The reason to have more  
26  
27 289 than one consensus meeting is to avoid the scenario in which the loudest voices dominate, and patients in  
28  
29 290 particular are not heard as clearly and to the extent that they should be. Since we anticipate 30-60  
30  
31 291 healthcare professionals, and approximately five patients to participate in the process, we anticipate three  
32  
33 292 virtual consensus meetings of 15-20 participants each, with each meeting also including patient  
34  
35  
36 293 participants. An additional benefit of having multiple consensus meetings is that different schedules and  
37  
38 294 time zones can be accommodated. Finally, if the outcomes of the different consensus meetings are not  
39  
40 295 fully consistent, an email ballot will be sent to all participants individually to resolve any remaining  
41  
42 296 issues. Each meeting will be moderated by an independent facilitator, and invited participants will  
43  
44 297 include all physicians and patients who participated in at least the first round of the Delphi. Each  
45  
46  
47 298 meeting will have balanced representation across stakeholder groups and geographic regions to  
48  
49 299 ensure the result is development of a global COS. Other non-physician, non-patient stakeholders  
50  
51 300 will be invited, as well.

1  
2  
3 301 Informed by the Delphi results, feedback regarding the consensus-derived set of  
4  
5 302 provisional outcomes and outcomes for which consensus has not been reached will be elicited  
6  
7 303 from the consensus meeting participants with the assistance of the facilitator. Using live polling  
8  
9 304 software, participants will vote to include or not include outcomes into the final core set of  
10  
11 305 outcomes. If multiple consensus meetings are held, and if there is any inconsistency between the  
12  
13 306 outcomes selected in these, a final email ballot will be circulated to all consensus meeting  
14  
15 307 participants to confirm the final COS. The result will be a core outcome set that reflects the  
16  
17 308 priorities and concerns of all stakeholders.  
18  
19  
20  
21

### 22 309 **Timeline**

23  
24  
25 310 The expected timeline from the start of the study to full development of the core set of  
26  
27 311 outcome domains will be 18 to 24 months. Identification of an initial list of outcomes, via  
28  
29 312 systematic review followed by qualitative interviews, will span approximately seven to eight  
30  
31 313 months. An additional seven to ten months will be dedicated to conducting the Delphi survey and  
32  
33 314 convening the consensus meeting, followed by approximately four to six months for analyzing  
34  
35 315 feedback and drafting, circulating, and finalizing the manuscript.  
36  
37  
38  
39  
40  
41  
42

### 43 317 **Patient and Public Involvement**

44  
45 318 The patient and public perspective will be sought at multiple points in this study. Patient  
46  
47 319 stakeholders will review plain language summaries of outcome definitions. A minimum of one  
48  
49 320 patient representative will be included in the research team, as described earlier in this protocol.  
50  
51 321 Additionally, patients will be recognized as key stakeholders during the identification and  
52  
53 322 prioritization of outcomes, with fully one-half of the Delphi process reserved for patients.  
54  
55  
56  
57  
58  
59  
60

1  
2  
3 323 Patients will be encouraged to provide feedback before (semi-structured interviews), during, and  
4  
5 324 after (at the consensus meeting) the Delphi process to ensure that patient-centered outcomes are  
6  
7 325 incorporated. Lastly, with their consent, patient representatives will be named as contributors in  
8  
9 326 any published work that arises from the study.  
10  
11  
12

13 327

## 16 328 **ETHICS AND DISSEMINATION**

### 18 329 **Dissemination and Implementation of Results**

21 330 The full development of this COS and the results of the study will be reported in peer-  
22  
23 331 reviewed journals. The main results of the study, including the core outcome set, will be  
24  
25 332 disseminated to all participants through email at the time of study publication. Researchers will  
26  
27 333 be encouraged to use the COS when performing future trials.  
28  
29  
30

31 334

### 34 335 **Ethical Approval and Consent to Participate**

37 336 Ethical approval and consent to participate for the study has been granted from the  
38  
39 337 Northwestern University IRB (protocol ID: STU00201637). Informed consent will be presented  
40  
41 338 before registering for the Delphi. The Northwestern University IRB has waived written informed  
42  
43 339 consent and has approved verbal consent for interviews, and online consent for the Delphi  
44  
45 340 process.  
46  
47  
48

49 341

## 52 342 **DISCUSSION**

1  
2  
3 343 Despite the numerous completed and ongoing clinical trials of treatments for melasma,  
4  
5 344 there is currently no COS informing such investigations. The proposed core outcome set for  
6  
7 345 melasma would provide a minimum set of outcomes to be reported in all trials of melasma, thus  
8  
9  
10 346 standardizing future outcomes reporting. Investigators would be free to consider and include  
11  
12 347 additional outcomes beyond the core set, but their use of at least the core set would allow  
13  
14 348 aggregation and comparison of data across melasma trials. Cross-trial comparisons of  
15  
16 349 treatments and large-scale meta-analyses would, in turn, enable more definitive conclusions on  
17  
18 350 the merits of available treatments.  
19  
20  
21  
22 351  
23  
24

## 25 352 **Trial Registration and Status**

26  
27  
28 353 This study has been registered with both the COMET and CS-COUSIN initiatives for  
29  
30 354 core outcome set development, and the development of this protocol is in accordance with the  
31  
32 355 guidelines for protocol development of both groups. The development of the core outcome set is  
33  
34  
35 356 currently in its initial phase of outcome extraction.  
36  
37  
38 357  
39  
40  
41 358  
42  
43  
44  
45  
46  
47  
48  
49  
50  
51  
52  
53  
54  
55  
56  
57  
58  
59  
60

1  
2  
3 360 **DECLARATIONS:**  
4

5 361

6  
7  
8 362 **Abbreviations**  
9

10 363 **COMET:** Core Outcome Measures in Effectiveness Trials  
11

12 364 **COS:** Core outcome set  
13

14 365 **CS-COUSIN:** Cochrane Skin - Core Outcome Set Initiative  
15

16  
17 366 **HOME:** Harmonising Outcome Measures for Eczema  
18

19 367 **IMPROVED:** Measurement of Priority Outcome Variables in Dermatologic Surgery Group  
20

21 368  
22

23  
24 369 **Consent for publication**  
25

26 370 All authors consent.  
27

28 371  
29

30  
31 372 I, the Submitting Author has the right to grant and does grant on behalf of all authors of the Work (as  
32  
33 373 defined in the below author licence), an exclusive licence and/or a non-exclusive licence for contributions  
34  
35 374 from authors who are: i) UK Crown employees; ii) where BMJ has agreed a CC-BY licence shall apply,  
36  
37 375 and/or iii) in accordance with the terms applicable for US Federal Government officers or employees  
38  
39 376 acting as part of their official duties; on a worldwide, perpetual, irrevocable, royalty-free basis to BMJ  
40  
41 377 Publishing Group Ltd (“BMJ”) its licensees and where the relevant Journal is co-owned by BMJ to the  
42  
43 378 co-owners of the Journal, to publish the Work in BMJ Open and any other BMJ products and to exploit  
44  
45 379 all rights, as set out in our [licence](#).  
46

47 380  
48

49 381 The Submitting Author accepts and understands that any supply made under these terms is made by BMJ  
50  
51 382 to the Submitting Author unless you are acting as an employee on behalf of your employer or a  
52  
53 383 postgraduate student of an affiliated institution which is paying any applicable article publishing charge  
54  
55 384 (“APC”) for Open Access articles. Where the Submitting Author wishes to make the Work available on  
56  
57  
58  
59  
60

1  
2  
3 385 an Open Access basis (and intends to pay the relevant APC), the terms of reuse of such Open Access shall  
4  
5 386 be governed by a Creative Commons licence – details of these licences and which [Creative](#)  
6  
7 387 [Commons](#) licence will apply to this Work are set out in our licence referred to above.  
8  
9  
10 388

### 11 389 **Data availability statement**

12  
13  
14 390 There are no data in this work.  
15  
16 391

### 17 392 **Funding**

18  
19 393 This publication was supported by Merz Center for Quality and Outcomes Research in  
20  
21 394 Dermatologic Surgery and the IMPROVED (Measurement of Priority Outcome Variables in  
22  
23 395 Dermatologic Surgery) Group.  
24  
25  
26 396

### 27 397 **Competing Interests**

28  
29  
30 398 None of the authors have personal or financial relationships with other people or organizations that may  
31  
32 399 influence their interpretation of data or presentation of information. Several of the authors (JFS, TVC,  
33  
34 400 IAN, JJK, KS, MA) have been involved also in the development of other core outcome sets, and several  
35  
36 401 (JJK, JS, MA) are members of the CS-COUSIN Methods group.  
37  
38  
39 402

### 40 403 **Acknowledgments**

41  
42 404 None  
43  
44  
45 405

### 46 406 **Author Contributions**

47  
48 407 *Study concept and design:* SAI, BYK, DIS, JT, JJK, JS, EP, IAM, JFS, TVC, and MA. *Drafting*  
49  
50 408 *of the manuscript:* SAI, BYK, SCG, EP, TVC, and MA. *Critical revision of the manuscript for*  
51  
52  
53  
54  
55  
56  
57  
58  
59  
60



1  
2  
3  
4  
5  
6  
7  
8  
9  
10  
11  
12  
13  
14  
15  
16  
17  
18  
19  
20  
21  
22  
23  
24  
25  
26  
27  
28  
29  
30  
31  
32  
33  
34  
35  
36  
37  
38  
39  
40  
41  
42  
43  
44  
45  
46  
47  
48  
49  
50  
51  
52  
53  
54  
55  
56  
57  
58  
59  
60

409 *important intellectual content: SAI, BYK, DIS, JJK, EP, and MA. Obtained funding: MA. Study*  
410 *supervision: MA. All authors read and approved the final manuscript.*

411

For peer review only

## 412 REFERENCES

- 413 1. Kauh YC, Zachian TF. Melasma. In: Mallia C, Uitto J, eds. *Rheumaderm. Advances in*  
414 *Experimental Medicine and Biology*. Vol 455. Springer; 1999:491-499. doi:10.1007/978-  
415 1-4615-4857-7\_72
- 416 2. Kang WH, Yoon KH, Lee ES, et al. Melasma: Histopathological characteristics in 56  
417 Korean patients. *Br J Dermatol*. 2002;146(2):228-237. doi:10.1046/j.0007-  
418 0963.2001.04556.x
- 419 3. Balkrishnan R, McMichael AJ, Camacho FT, et al. Development and validation of a  
420 health-related quality of life instrument for women with melasma. *Br J Dermatol*.  
421 2003;149(3):572-577. doi:10.1046/j.1365-2133.2003.05419.x
- 422 4. Mahmoud BH, Ruvolo E, Hexsel CL, et al. Impact of long-wavelength UVA and visible  
423 light on melanocompetent skin. *J Invest Dermatol*. 2010;130(8):2092-2097.  
424 doi:10.1038/jid.2010.95
- 425 5. Ortonne J, Arellano I, Berneburg M, et al. A global survey of the role of ultraviolet  
426 radiation and hormonal influences in the development of melasma. *J Eur Acad*  
427 *Dermatology Venereol*. 2009;23(11):1254-1262. doi:10.1111/j.1468-3083.2009.03295.x
- 428 6. Jang YH, Sim JH, Kang HY, Kim YC, Lee ES. The histopathological characteristics of  
429 male melasma: Comparison with female melasma and lentigo. *J Am Acad Dermatol*.  
430 2012;66(4):642-649. doi:10.1016/j.jaad.2010.10.037
- 431 7. Hernández-Barrera R, Torres-Alvarez B, Castanedo-Cazares JP, Oros-Ovalle C, Moncada  
432 B. Solar elastosis and presence of mast cells as key features in the pathogenesis of

- 1  
2  
3 433 melasma. *Clin Exp Dermatol*. 2008;33(3):305-308. doi:10.1111/j.1365-  
4  
5 434 2230.2008.02724.x  
6  
7  
8 435 8. Rajaratnam R, Halpern J, Salim A, Emmett C. Interventions for melasma. *Cochrane*  
9  
10 436 *Database Syst Rev*. 2010;(7):CD003583. doi:10.1002/14651858.cd003583.pub2  
11  
12  
13 437 9. Kirkham JJ, Dwan KM, Altman DG, et al. The impact of outcome reporting bias in  
14  
15 randomised controlled trials on a cohort of systematic reviews. *BMJ*. 2010;340:c365.  
16 438 doi:10.1136/bmj.c365  
17  
18 439  
19  
20  
21 440 10. COMET Initiative. Accessed October 2, 2020. <https://www.comet-initiative.org/>  
22  
23  
24 441 11. Cochrane Skin – Core Outcome Set Initiative. Accessed October 2, 2020. <http://cs->  
25  
26 442 [cousin.org/](http://cs-cousin.org/)  
27  
28  
29 443 12. Schmitt J, Spuls P, Boers M, et al. Towards global consensus on outcome measures for  
30  
31 444 atopic eczema research: Results of the HOME II meeting. *Allergy*. 2012;67(9):1111-1117.  
32  
33 445 doi:10.1111/j.1398-9995.2012.02874.x  
34  
35  
36  
37 446 13. Schmitt J, Williams H, HOME Development Group. Harmonising Outcome Measures for  
38  
39 447 Eczema (HOME). Report from the first international consensus meeting (HOME 1), 24  
40  
41 448 July 2010, Munich, Germany. *Br J Dermatol*. 2010;163(6):1166-1168.  
42  
43 449 doi:10.1111/j.1365-2133.2010.10054.x  
44  
45  
46  
47 450 14. Schmitt J, Spuls PI, Thomas KS, et al. The Harmonising Outcome Measures for Eczema  
48  
49 451 (HOME) statement to assess clinical signs of atopic eczema in trials. *J Allergy Clin*  
50  
51 452 *Immunol*. 2014;134(4):800-807. doi:10.1016/j.jaci.2014.07.043  
52  
53  
54 453 15. Chalmers JR, Schmitt J, Apfelbacher C, et al. Report from the third international  
55  
56  
57  
58  
59  
60

- 1  
2  
3 454 consensus meeting to harmonise core outcome measures for atopic eczema/dermatitis  
4  
5 455 clinical trials (HOME). *Br J Dermatol*. 2014;171(6):1318-1325. doi:10.1111/bjd.13237  
6  
7  
8 456 16. Schmitt J, Apfelbacher C, Spuls PI, et al. The Harmonizing Outcome Measures for  
9  
10 457 Eczema (HOME) Roadmap: A Methodological Framework to Develop Core Sets of  
11  
12 458 Outcome Measurements in Dermatology. *J Invest Dermatol*. 2015;135(1):24-30.  
13  
14 459 doi:10.1038/jid.2014.320  
15  
16  
17  
18 460 17. Williamson PR, Altman DG, Bagley H, et al. The COMET Handbook: Version 1.0.  
19  
20 461 doi:10.1186/s13063-017-1978-4  
21  
22  
23 462 18. CS-COUSIN Methods Group. Guidance on how to develop a core outcome set for skin  
24  
25 463 disease by the CS-COUSIN methods group, Version 2.2. Published online September 5,  
26  
27 464 2018.  
28  
29  
30  
31 465 19. COMET Initiative | Core Outcome Set for Melasma. Accessed October 29, 2020.  
32  
33 466 <https://www.comet-initiative.org/studies/details/752>  
34  
35  
36 467 20. Core Outcome Set for Melasma. Accessed October 29, 2020. [http://cs-](http://cs-cousin.org/melasma/)  
37  
38 468 [cousin.org/melasma/](http://cs-cousin.org/melasma/)  
39  
40  
41 469 21. Kirkham JJ, Gorst S, Altman DG, et al. Core Outcome Set-STANDARDISED Protocol Items:  
42  
43 470 The COS-STAP Statement. *Trials*. 2019;20(1):116. doi:10.1186/s13063-019-3230-x  
44  
45  
46  
47 471 22. Iyengar S, Williamson PR, Schmitt J, et al. Development of a core outcome set for clinical  
48  
49 472 trials in rosacea: Study protocol for a systematic review of the literature and identification  
50  
51 473 of a core outcome set using a Delphi survey. *Trials*. 2016;17(1):429. doi:10.1186/s13063-  
52  
53 474 016-1554-3  
54  
55  
56  
57  
58  
59  
60

- 1  
2  
3 475 23. Reynolds KA, Schlessinger DI, Vasic J, et al. Core Outcome Set for Actinic Keratosis  
4  
5 476 Clinical Trials. *JAMA Dermatology*. 2020;156(3):326-333.  
6  
7  
8 477 doi:10.1001/jamadermatol.2019.4212  
9  
10  
11 478 24. Reynolds KA, Schlessinger DI, Yanes AF, et al. Development of a core outcome set for  
12  
13 479 cutaneous squamous cell carcinoma trials: identification of core domains and outcomes  
14  
15 480 [published online ahead of print, 2020 Nov 25]. *Br J Dermatol*. Published online 2020.  
16  
17 481 doi:10.1111/bjd.19693  
18  
19  
20  
21 482 25. Ingram JR, Hadjieconomou S, Piguet V. Development of core outcome sets in hidradenitis  
22  
23 483 suppurativa: systematic review of outcome measure instruments to inform the process. *Br*  
24  
25 484 *J Dermatol*. 2016;175(2):263-272. doi:10.1111/bjd.14475  
26  
27  
28 485 26. Thorlacius L, Ingram JR, Garg A, et al. Protocol for the development of a core domain set  
29  
30 486 for hidradenitis suppurativa trial outcomes. *BMJ Open*. 2017;7(2):14733.  
31  
32 487 doi:10.1136/bmjopen-2016-014733  
33  
34  
35  
36 488 27. Guideline for Selecting Instruments for a Core Outcome Set • COSMIN. Accessed  
37  
38 489 October 2, 2020. <https://www.cosmin.nl/tools/guideline-selecting-proms-cos/>  
39  
40  
41 490 28. Young AE, Brookes ST, Avery KNL, Davies A, Metcalfe C, Blazeby JM. A systematic  
42  
43 491 review of core outcome set development studies demonstrates difficulties in defining  
44  
45 492 unique outcomes. *J Clin Epidemiol*. 2019;115:14-24. doi:10.1016/j.jclinepi.2019.06.016  
46  
47  
48  
49 493 29. COMET Initiative | Outcome Classification. Accessed October 2, 2020.  
50  
51 494 <https://www.comet-initiative.org/Resources/OutcomeClassification>  
52  
53  
54 495 30. Lange T, Kottner J, Weberschock T, et al. Outcome assessment in dermatology clinical  
55  
56  
57  
58  
59  
60

- 1  
2  
3 496 trials and cochrane reviews: call for a dermatology-specific outcome taxonomy. *J Eur*  
4  
5 497 *Acad Dermatology Venereol.* 2021;35(2):523-535. doi:10.1111/jdv.16854  
6  
7  
8 498 31. Smith H, Horobin A, Fackrell K, Colley V, Thacker B, Hall DA. Defining and evaluating  
9  
10 499 novel procedures for involving patients in core outcome set research: Creating a  
11  
12 500 meaningful long list of candidate outcome domains. *Res Involv Engagem.* 2018;4(1):1-12.  
13  
14 501 doi:10.1186/s40900-018-0091-5  
15  
16  
17  
18 502 32. Guyatt GH, Oxman AD, Kunz R, et al. GRADE guidelines: 2. Framing the question and  
19  
20 503 deciding on important outcomes. *J Clin Epidemiol.* 2011;64(4):395-400.  
21  
22 504 doi:10.1016/j.jclinepi.2010.09.012  
23  
24  
25  
26 505 33. Harman NL, Bruce IA, Kirkham JJ, et al. The importance of integration of stakeholder  
27  
28 506 views in core outcome set development: Otitis Media with Effusion in children with cleft  
29  
30 507 palate. *PLoS One.* 2015;10(6):e0129514. doi:10.1371/journal.pone.0129514  
31  
32  
33  
34 508 34. Williamson PR, Altman DG, Blazeby JM, et al. Developing core outcome sets for clinical  
35  
36 509 trials: Issues to consider. *Trials.* 2012;13:132. doi:10.1186/1745-6215-13-132  
37  
38  
39 510 35. Potter S, Holcombe C, Ward JA, Blazeby JM. Development of a core outcome set for  
40  
41 511 research and audit studies in reconstructive breast surgery. *Br J Surg.* 2015;102(11):1360-  
42  
43 512 1371. doi:10.1002/bjs.9883  
44  
45  
46 513 36. Blazeby JM, Macefield R, Blencowe NS, et al. Core information set for oesophageal  
47  
48 514 cancer surgery. *Br J Surg.* 2015;102(8):936-943. doi:10.1002/bjs.9840  
49  
50  
51  
52 515
